# Supplementary material for: RNA-Seq analysis revealed genes associated with drought stress response in kabuli chickpea (Cicer arietinum L.)
Source: PLoS One. 2018 Jun 28;13(6):e0199774. doi: 10.1371/journal.pone.0199774 (PMC6023194; doi:10.1371/journal.pone.0199774)
Supplement: S2 Table — (XLS) [file pone.0199774.s002.xls]

## Sheet: Drought responsive genes-root
S2 Table: Drought responsive genes in the root tissues
Sno	Test_Gene_Id	Reference_Gene_Id	Location	BRD_FPKM	HRD_FPKM	log2(fold_change)	Annotation (GO Terms)	Enzyme codes (EC)
1	XLOC_000635	Ca_08030,Ca_08031,Ca_08035	Ca1:7778433-7874591	10.8911	46.4004	2.09099
2	XLOC_000884	Ca_02523	Ca1:12302405-12303915	13.4082	71.8086	2.42104
3	XLOC_000886	Ca_02521	Ca1:12309660-12310278	33.4319	154.026	2.20387
4	XLOC_001151	Ca_14726	Ca1:18160825-18162799	139.506	1182.96	3.084
5	XLOC_001265	Ca_19296	Ca1:23857119-23876079	5.13688	50.4702	3.29647
6	XLOC_001595	Ca_22669	Ca1:42366161-42366341	8.82252	39.2569	2.15368	P GO:0006511 ubiquitin-dependent protein catabolic process
7	XLOC_002197	Ca_02925	Ca1:8828002-8829204	11.2026	54.3649	2.27884
8	XLOC_002433	Ca_02457	Ca1:12877080-12882516	6.95259	29.8999	2.10452	C GO:0005634 nucleus,F GO:0003677 DNA binding,P GO:0006351 transcription, DNA-templated,P GO:0006355 regulation of transcription, DNA-templated
9	XLOC_002711	Ca_17370	Ca1:18897192-18897921	6.24066	35.6296	2.5133
10	XLOC_003163	Ca_18460,Ca_18462	Ca1:40872719-40886900	14.7227	80.2584	2.44661	F GO:0004553 hydrolase activity, hydrolyzing O-glycosyl compounds,F GO:0016491 oxidoreductase activity,F GO:0046872 metal ion binding,P GO:0005975 carbohydrate metabolic process,P GO:0055114 oxidation-reduction process
11	XLOC_003447	-	Ca1:16276444-16277474	33.8347	285.225	3.07552	F GO:0005509 calcium ion binding
12	XLOC_003532	-	Ca1:38438455-38439381	4.93366	23.8064	2.27062	P GO:0010413 glucuronoxylan metabolic process,P GO:0045492 xylan biosynthetic process
13	XLOC_003804	Ca_14649	Ca2:5630005-5631559	26.8061	135.098	2.33337	F GO:0009055 electron carrier activity
14	XLOC_003900	Ca_21460	Ca2:8390505-8393122	32.0126	212.421	2.73022
15	XLOC_003962	Ca_17586	Ca2:10423206-10434881	16.1588	77.4454	2.26086
16	XLOC_003991	-	Ca2:11482638-11485539	5.04051	20.9821	2.05752
17	XLOC_004178	Ca_23047	Ca2:21593489-21594507	37.3635	251.607	2.75147
18	XLOC_004296	Ca_14296	Ca2:25797418-25800700	11.7663	55.7836	2.24518	F GO:0004722 protein serine/threonine phosphatase activity,F GO:0046872 metal ion binding,P GO:0006470 protein dephosphorylation	EC:3.1.3.16; EC:3.1; EC:3.1.3.41
19	XLOC_004304	Ca_14307	Ca2:26000312-26002137	7.50258	33.8359	2.1731
20	XLOC_004436	Ca_12515	Ca2:30364422-30367643	5.3599	24.4469	2.18937	C GO:0048046 apoplast,F GO:0005507 copper ion binding,F GO:0052716 hydroquinone:oxygen oxidoreductase activity,P GO:0046274 lignin catabolic process,P GO:0055114 oxidation-reduction process	EC:1.10.3; EC:1.10.3.2
21	XLOC_004671	Ca_09727	Ca2:35586508-35592414	5.52319	31.6839	2.52017
22	XLOC_004843	Ca_10566	Ca2:2766591-2767404	22.629	205.299	3.18148	F GO:0016757 transferase activity, transferring glycosyl groups,P GO:0008152 metabolic process
23	XLOC_004855	Ca_10545	Ca2:2973280-2974503	19.2502	78.9319	2.03574	F GO:0005524 ATP binding,F GO:0016787 hydrolase activity,P GO:0008152 metabolic process
24	XLOC_005292	Ca_15957	Ca2:18930021-18932424	4.99809	22.4568	2.16771	F GO:0016491 oxidoreductase activity,F GO:0046872 metal ion binding,P GO:0030001 metal ion transport,P GO:0055114 oxidation-reduction process
25	XLOC_005302	Ca_24536	Ca2:19594878-19595354	11.3715	109.926	3.27304
26	XLOC_005557	Ca_16138	Ca2:29462559-29463900	3.60992	40.7692	3.49744	F GO:0004842 ubiquitin-protein transferase activity,F GO:0016874 ligase activity,P GO:0016567 protein ubiquitination
27	XLOC_005860	Ca_09798	Ca2:36183189-36184302	40.441	279.688	2.78993
28	XLOC_006029	-	Ca2:33798356-33799018	9.0083	71.9632	2.99793
29	XLOC_006124	Ca_22380	Ca3:4206078-4206681	58.571	292.669	2.32101	F GO:0005509 calcium ion binding
30	XLOC_006364	Ca_22500	Ca3:14811462-14814472	3.28452	19.5134	2.57071	F GO:0016758 transferase activity, transferring hexosyl groups,P GO:0008152 metabolic process
31	XLOC_006503	Ca_09419	Ca3:20150944-20154810	3.14412	16.0404	2.35098
32	XLOC_006949	Ca_07341	Ca3:30278412-30280824	5.79472	30.586	2.40006	F GO:0016787 hydrolase activity,P GO:0008152 metabolic process
33	XLOC_007563	Ca_20654	Ca3:5552209-5557457	7.20449	30.6927	2.09093	F GO:0016491 oxidoreductase activity,F GO:0046872 metal ion binding,P GO:0055114 oxidation-reduction process
34	XLOC_008123	Ca_06009	Ca3:25177049-25177442	4.82814	33.1848	2.78099
35	XLOC_008400	Ca_12195	Ca3:30973535-30975125	20.5697	108.195	2.39504	C GO:0005634 nucleus,P GO:0006351 transcription, DNA-templated,P GO:0006355 regulation of transcription, DNA-templated,P GO:0009734 auxin-activated signaling pathway
36	XLOC_008496	Ca_12034,Ca_12049	Ca3:32955477-33185940	42.2334	225.178	2.41461	P GO:0009834 plant-type secondary cell wall biogenesis
37	XLOC_008541	Ca_00703	Ca3:34274661-34276354	3.35417	14.5569	2.11767
38	XLOC_008607	Ca_00844	Ca3:35597305-35598004	9.69809	44.8382	2.20895
39	XLOC_008698	Ca_00999	Ca3:36767351-36767843	28.9911	137.173	2.24232
40	XLOC_009047	-	Ca3:32551839-32553084	8.93754	70.741	2.9846	F GO:0046872 metal ion binding
41	XLOC_009090	-	Ca3:39630671-39631714	5.90712	46.7543	2.98457	P GO:0009733 response to auxin
42	XLOC_009214	Ca_12079	Ca4:2797715-2798126	8.30369	40.7946	2.29655	C GO:0005634 nucleus,F GO:0003677 DNA binding,F GO:0003700 transcription factor activity, sequence-specific DNA binding,P GO:0006351 transcription, DNA-templated,P GO:0006355 regulation of transcription, DNA-templated
43	XLOC_009242	Ca_12140	Ca4:3390349-3391779	21.7235	96.1372	2.14584	C GO:0005634 nucleus,P GO:0006351 transcription, DNA-templated,P GO:0006355 regulation of transcription, DNA-templated,P GO:0009734 auxin-activated signaling pathway
44	XLOC_010966	-	Ca4:1251559-1254302	5.97918	35.5381	2.57135	F GO:0046872 metal ion binding,F GO:0051213 dioxygenase activity,P GO:0055114 oxidation-reduction process
45	XLOC_011077	Ca_12133	Ca4:3315371-3322825	3.2111	44.7249	3.79994	F GO:0016491 oxidoreductase activity,F GO:0046872 metal ion binding,P GO:0055114 oxidation-reduction process
46	XLOC_011286	Ca_03495	Ca4:7418501-7419020	5.6356	64.2648	3.51139	F GO:0016491 oxidoreductase activity,F GO:0046872 metal ion binding,P GO:0055114 oxidation-reduction process
47	XLOC_011602	-	Ca4:13764443-13769460	9.13161	45.4742	2.31611
48	XLOC_011613	Ca_04628	Ca4:13922660-14070604	17.6523	75.9844	2.10585
49	XLOC_011691	Ca_05567	Ca4:15310993-15311503	48.1027	212.487	2.14318
50	XLOC_011793	Ca_05360	Ca4:17673535-17675038	6.17793	43.5459	2.81734
51	XLOC_012106	Ca_14187	Ca4:30207835-30208336	4.61439	21.1833	2.19872
52	XLOC_012410	Ca_10972	Ca4:41355952-41356276	39.9949	167.493	2.06621
53	XLOC_012621	-	Ca4:47467961-47468071	850.737	5487.55	2.68938
54	XLOC_012668	Ca_23007	Ca4:48574131-48577026	6.46889	34.7394	2.42498
55	XLOC_012813	-	Ca4:20031863-20034079	3.96632	27.0955	2.77218	F GO:0004190 aspartic-type endopeptidase activity,P GO:0006508 proteolysis	EC:3.4.23
56	XLOC_012981	-	Ca4:47792102-47793024	3.76653	15.9581	2.08298
57	XLOC_014011	Ca_01602	Ca5:36220759-36221158	7.47541	32.5615	2.12294	C GO:0016021 integral component of membrane,F GO:0022891 substrate-specific transmembrane transporter activity,P GO:0055085 transmembrane transport
58	XLOC_014089	Ca_01449	Ca5:37735262-37737448	30.1715	135.723	2.16941	F GO:0009055 electron carrier activity,F GO:0046872 metal ion binding,P GO:0055114 oxidation-reduction process
59	XLOC_014498	Ca_04051	Ca5:46032839-46039713	3.40978	15.5261	2.18695
60	XLOC_014525	Ca_04100	Ca5:46422862-46424540	11.9301	55.9078	2.22845	F GO:0003700 transcription factor activity, sequence-specific DNA binding,F GO:0043565 sequence-specific DNA binding,P GO:0006355 regulation of transcription, DNA-templated
61	XLOC_014800	Ca_20342	Ca5:8945826-8950474	31.6372	137.057	2.11508
62	XLOC_015409	Ca_04788	Ca5:30904918-30907690	77.4883	463.695	2.58113
63	XLOC_015766	Ca_01449	Ca5:37735262-37737448	3.351	16.0528	2.26016
64	XLOC_016122	Ca_03979	Ca5:45366456-45375618	15.1361	65.3737	2.11072	F GO:0005509 calcium ion binding
65	XLOC_016449	-	Ca5:37761823-37763067	11.5248	71.7304	2.63784
66	XLOC_016473	-	Ca5:43812095-43813315	14.0428	64.758	2.20523	F GO:0008270 zinc ion binding
67	XLOC_016526	Ca_13274	Ca6:538010-539291	19.852	123.509	2.63726	F GO:0004842 ubiquitin-protein transferase activity,F GO:0016874 ligase activity,P GO:0016567 protein ubiquitination
68	XLOC_016636	Ca_10425	Ca6:2875882-2877851	7.73214	47.1113	2.60714	F GO:0016787 hydrolase activity,P GO:0008152 metabolic process
69	XLOC_016644	Ca_10437	Ca6:2951774-2954662	7.37063	38.2964	2.37735	F GO:0005516 calmodulin binding,P GO:0006950 response to stress
70	XLOC_016739	Ca_05815	Ca6:4813994-4817645	4.12491	17.3704	2.0742	F GO:0003700 transcription factor activity, sequence-specific DNA binding,F GO:0043565 sequence-specific DNA binding,P GO:0006355 regulation of transcription, DNA-templated
71	XLOC_016792	Ca_05720	Ca6:5740785-5741313	3.86748	126.778	5.03477
72	XLOC_017317	Ca_06350	Ca6:17347693-17350822	3.65028	18.389	2.33276	C GO:0016021 integral component of membrane,F GO:0016760 cellulose synthase (UDP-forming) activity,P GO:0030244 cellulose biosynthetic process,P GO:0071555 cell wall organization	EC:2.4.1.12; EC:2.4.1
73	XLOC_017416	Ca_06533	Ca6:19269662-19274430	8.17762	36.0437	2.13999	C GO:0016021 integral component of membrane,F GO:0022857 transmembrane transporter activity,P GO:0055085 transmembrane transport
74	XLOC_018478	Ca_13265	Ca6:400309-403969	7.9385	47.7738	2.58928	C GO:0005819 spindle,C GO:0005874 microtubule,P GO:0032147 activation of protein kinase activity,P GO:0060236 regulation of mitotic spindle organization
75	XLOC_018537	Ca_10320	Ca6:1842232-1990290	16.3173	76.6343	2.23159	P GO:0006952 defense response
76	XLOC_019150	Ca_05235	Ca6:14653474-14653879	4.8259	48.9018	3.34102
77	XLOC_019282	Ca_06367	Ca6:17524459-17526556	8.13578	37.5806	2.20763	C GO:0005622 intracellular,C GO:0005886 plasma membrane,F GO:0005525 GTP binding,P GO:0007015 actin filament organization,P GO:0007264 small GTPase mediated signal transduction,P GO:0009832 plant-type cell wall biogenesis,P GO:0010413 glucuronoxylan metabolic process,P GO:0045492 xylan biosynthetic process
78	XLOC_019356	-	Ca6:19232122-19234557	3.07059	15.917	2.37398
79	XLOC_020499	-	Ca6:4958627-4959690	5.57868	24.9746	2.16247
80	XLOC_020769	-	Ca6:57700240-57701154	16.8593	72.9455	2.11328	C GO:0016021 integral component of membrane
81	XLOC_020914	Ca_03226	Ca7:2530776-2531400	37.3514	189.825	2.34544	F GO:0005509 calcium ion binding
82	XLOC_020940	Ca_03171	Ca7:3011846-3013292	10.7619	140.232	3.70382
83	XLOC_021082	Ca_06804	Ca7:5583457-5584426	7.85528	47.5582	2.59796
84	XLOC_021227	Ca_13180	Ca7:8312070-8318138	6.55005	33.2304	2.34293
85	XLOC_021399	Ca_09313	Ca7:11848648-11849014	11.3006	74.3389	2.71772	C GO:0016021 integral component of membrane
86	XLOC_021493	Ca_16068	Ca7:13957242-13959023	43.4341	181.673	2.06445
87	XLOC_021800	Ca_19895	Ca7:24775712-24776591	49.7507	346.21	2.79886	F GO:0005509 calcium ion binding
88	XLOC_021920	Ca_11721	Ca7:30061759-30065203	4.68146	20.9999	2.16535	F GO:0004553 hydrolase activity, hydrolyzing O-glycosyl compounds,P GO:0005975 carbohydrate metabolic process
89	XLOC_022059	Ca_21006	Ca7:34128577-34167676	8.26141	40.3612	2.28851	F GO:0003677 DNA binding,F GO:0003899 DNA-directed RNA polymerase activity,F GO:0032549 ribonucleoside binding,P GO:0006351 transcription, DNA-templated	EC:2.7.7.6
90	XLOC_022525	Ca_03261	Ca7:2107969-2109027	14.2406	107.337	2.91407	C GO:0005618 cell wall,C GO:0048046 apoplast,F GO:0004553 hydrolase activity, hydrolyzing O-glycosyl compounds,F GO:0016762 xyloglucan:xyloglucosyl transferase activity,P GO:0010411 xyloglucan metabolic process,P GO:0042546 cell wall biogenesis,P GO:0071555 cell wall organization	EC:2.4.1.207
91	XLOC_022526	Ca_03260	Ca7:2111267-2112410	5.09916	39.9161	2.96864	C GO:0005618 cell wall,C GO:0048046 apoplast,F GO:0004553 hydrolase activity, hydrolyzing O-glycosyl compounds,F GO:0016762 xyloglucan:xyloglucosyl transferase activity,P GO:0010411 xyloglucan metabolic process,P GO:0042546 cell wall biogenesis,P GO:0071555 cell wall organization	EC:2.4.1.207
92	XLOC_022568	Ca_03175	Ca7:2983667-2986920	9.93687	55.4255	2.47969	C GO:0005576 extracellular region,F GO:0004601 peroxidase activity,F GO:0020037 heme binding,F GO:0046872 metal ion binding,P GO:0006979 response to oxidative stress,P GO:0042744 hydrogen peroxide catabolic process,P GO:0055114 oxidation-reduction process	EC:1.11.1.7
93	XLOC_022745	Ca_06753	Ca7:6064075-6064495	26.7532	172.738	2.6908
94	XLOC_023064	Ca_09253	Ca7:12462930-12742492	4.37985	31.9501	2.86687	F GO:0003824 catalytic activity,P GO:0008152 metabolic process
95	XLOC_023105	Ca_16068	Ca7:13957242-13959023	7.74473	33.6184	2.11797
96	XLOC_023156	Ca_09921	Ca7:15357785-15373648	4.46424	33.852	2.92276
97	XLOC_023409	Ca_19895	Ca7:24775712-24776591	7.37416	48.0178	2.70302
98	XLOC_023469	Ca_18928	Ca7:28410627-28418274	7.10891	34.2973	2.2704
99	XLOC_024530	Ca_02262	Ca8:3173502-3174182	3.05183	13.5653	2.15218	F GO:0003677 DNA binding,F GO:0046983 protein dimerization activity
100	XLOC_024708	Ca_01941	Ca8:6050830-6051235	4.95642	23.2851	2.23203	F GO:0008270 zinc ion binding
101	XLOC_025272	Ca_02239	Ca8:3400517-3400889	3.27816	13.5333	2.04555
102	XLOC_025737	Ca_12972	Ca8:14998301-15003881	12.9467	88.4744	2.77267	F GO:0016620 oxidoreductase activity, acting on the aldehyde or oxo group of donors, NAD or NADP as acceptor,P GO:0055114 oxidation-reduction process
103	XLOC_026502	Ca_22970	scaffold12:82362-82614	3.4624	25.9263	2.90457
104	XLOC_026514	Ca_22983	scaffold12:321205-321448	17.8077	118.719	2.73698
105	XLOC_026824	Ca_22589	scaffold134:306652-307027	6.87484	36.4639	2.40707	F GO:0005509 calcium ion binding
106	XLOC_027582	Ca_25723	scaffold1710:52334-52691	7.38228	31.9999	2.11593
107	XLOC_027606	Ca_25390	scaffold1729:41221-42370	15.1645	73.7514	2.28198
108	XLOC_027626	Ca_21708	scaffold174:77077-77284	49.9009	203.919	2.03086	C GO:0016021 integral component of membrane
109	XLOC_027735	-	scaffold1777:414932-416500	4.98661	20.6704	2.05144
110	XLOC_028159	-	scaffold206:176068-216172	24.0841	179.834	2.90052
111	XLOC_028705	Ca_27757	scaffold2678:104597-105545	16.208	99.8003	2.62234	F GO:0016798 hydrolase activity, acting on glycosyl bonds,P GO:0008152 metabolic process
112	XLOC_028706	Ca_27756	scaffold2678:94319-95264	14.9041	90.3527	2.59986
113	XLOC_029232	Ca_16309	scaffold3254_2:106996-107736	3.05683	58.6341	4.26163
114	XLOC_029409	Ca_25598	scaffold3422:40968-42132	48.5992	366.658	2.91543	F GO:0046872 metal ion binding,P GO:0030001 metal ion transport
115	XLOC_029530	Ca_24991,Ca_24992	scaffold362:163781-167452	30.7881	127.14	2.04598
116	XLOC_029642	Ca_23626	scaffold38:479656-481637	22.2466	158.686	2.83451	C GO:0005634 nucleus,F GO:0003677 DNA binding,F GO:0003700 transcription factor activity, sequence-specific DNA binding,P GO:0006351 transcription, DNA-templated,P GO:0006355 regulation of transcription, DNA-templated
117	XLOC_030315	Ca_25364	scaffold498:154079-157200	3.21664	16.9197	2.39508	C GO:0048046 apoplast,F GO:0005507 copper ion binding,F GO:0052716 hydroquinone:oxygen oxidoreductase activity,P GO:0046274 lignin catabolic process,P GO:0055114 oxidation-reduction process	EC:1.10.3; EC:1.10.3.2
118	XLOC_030401	-	scaffold527:116233-116400	3.46781	20.6077	2.57108
119	XLOC_030864	Ca_19118	scaffold642:612312-625788	25.8386	136.602	2.40238	F GO:0005509 calcium ion binding,F GO:0005544 calcium-dependent phospholipid binding
120	XLOC_031802	Ca_21058	scaffold916:517386-520935	238.633	1452.9	2.60607
121	XLOC_031855	-	scaffold924:37878-39137	5.58594	32.3498	2.53388
122	XLOC_001582	Ca_22524	Ca1:41865950-41867598	37.9543	4.99533	-2.92561
123	XLOC_001657	Ca_25715	Ca1:45003082-45251276	49.048	8.30937	-2.56138	F GO:0016866 intramolecular transferase activity,P GO:0008152 metabolic process
124	XLOC_002035	Ca_00603	Ca1:5128706-5130991	508.733	10.0691	-5.6589	C GO:0016021 integral component of membrane,F GO:0005215 transporter activity,P GO:0006810 transport
125	XLOC_002680	-	Ca1:18010746-18012912	114.65	24.882	-2.20407
126	XLOC_002880	Ca_20295	Ca1:26963387-26965788	53.3174	9.81526	-2.44151	F GO:0016491 oxidoreductase activity,F GO:0046872 metal ion binding,P GO:0055114 oxidation-reduction process
127	XLOC_003377	-	Ca1:1777076-1778063	27.1118	5.08692	-2.41406	C GO:0005622 intracellular,F GO:0004553 hydrolase activity, hydrolyzing O-glycosyl compounds,F GO:0008270 zinc ion binding,F GO:0016491 oxidoreductase activity,P GO:0005975 carbohydrate metabolic process,P GO:0055114 oxidation-reduction process
128	XLOC_003785	Ca_14692	Ca2:5192004-5192424	29.295	3.05279	-3.26245
129	XLOC_004695	Ca_09767	Ca2:35915244-35918239	110.256	11.9385	-3.20717	C GO:0009507 chloroplast,F GO:0008878 glucose-1-phosphate adenylyltransferase activity,P GO:0005978 glycogen biosynthetic process,P GO:0019252 starch biosynthetic process	EC:2.7.7.27
130	XLOC_004749	Ca_16983	Ca2:395581-401546	102.956	23.847	-2.11015
131	XLOC_005103	Ca_17575	Ca2:10588508-10590057	151.744	36.4398	-2.05805	F GO:0046872 metal ion binding,P GO:0030001 metal ion transport
132	XLOC_005590	Ca_12525	Ca2:30242079-30242541	31.9633	4.5122	-2.82452	F GO:0004842 ubiquitin-protein transferase activity,F GO:0016874 ligase activity,P GO:0016567 protein ubiquitination
133	XLOC_006023	-	Ca2:32404702-32404868	21.746	4.30669	-2.3361
134	XLOC_006059	Ca_22645	Ca3:727041-729844	161.957	30.102	-2.42768	F GO:0004497 monooxygenase activity,F GO:0005506 iron ion binding,F GO:0016705 oxidoreductase activity, acting on paired donors, with incorporation or reduction of molecular oxygen,F GO:0020037 heme binding,P GO:0055114 oxidation-reduction process
135	XLOC_006182	Ca_25770	Ca3:6701792-6705218	16.6916	4.0131	-2.05633	F GO:0005509 calcium ion binding
136	XLOC_006756	Ca_08264,Ca_08265	Ca3:26393782-26438352	85.9952	17.3886	-2.30611	F GO:0008429 phosphatidylethanolamine binding,P GO:0009909 regulation of flower development,P GO:0048573 photoperiodism, flowering
137	XLOC_007847	Ca_19621	Ca3:18351281-18373539	45.3792	10.676	-2.08766	F GO:0016740 transferase activity,P GO:0008152 metabolic process
138	XLOC_009221	Ca_12090	Ca4:2920979-2924481	13.8083	3.1952	-2.11155
139	XLOC_009399	Ca_03626	Ca4:6173495-6174416	19.9384	4.40852	-2.17718	F GO:0030410 nicotianamine synthase activity,P GO:0030418 nicotianamine biosynthetic process	EC:2.5.1.43
140	XLOC_011507	Ca_04411	Ca4:11891329-11895735	46.9053	9.17169	-2.35449	F GO:0004674 protein serine/threonine kinase activity,F GO:0005516 calmodulin binding,F GO:0005524 ATP binding,F GO:0030246 carbohydrate binding,P GO:0006468 protein phosphorylation,P GO:0048544 recognition of pollen	EC:2.7.11
141	XLOC_012419	Ca_10955	Ca4:41531940-41546838	19.5927	4.69986	-2.05963
142	XLOC_012770	-	Ca4:14810463-14810711	36.6152	3.1337	-3.54651
143	XLOC_013717	Ca_04774	Ca5:30794818-30799469	43.0389	8.56961	-2.32834	C GO:0009507 chloroplast,F GO:0008878 glucose-1-phosphate adenylyltransferase activity,P GO:0005978 glycogen biosynthetic process,P GO:0019252 starch biosynthetic process	EC:2.7.7.27
144	XLOC_013732	Ca_04795	Ca5:30961338-30963616	69.2541	10.3286	-2.74526	C GO:0016021 integral component of membrane,F GO:0022891 substrate-specific transmembrane transporter activity,P GO:0055085 transmembrane transport
145	XLOC_014097	Ca_01425	Ca5:37968716-37970356	17.2729	3.61631	-2.25592
146	XLOC_014235	Ca_07629	Ca5:41102848-41105054	62.4643	12.6786	-2.30064
147	XLOC_015786	Ca_01418	Ca5:38030159-38032006	163.247	34.8056	-2.22966	C GO:0005886 plasma membrane,C GO:0016021 integral component of membrane,P GO:0008643 carbohydrate transport
148	XLOC_016850	Ca_16949	Ca6:6867164-6871928	63.6375	9.63865	-2.72297	C GO:0016021 integral component of membrane
149	XLOC_016864	Ca_09664	Ca6:7195435-7196989	303.262	40.8555	-2.89196
150	XLOC_017470	Ca_16328	Ca6:21054418-21056493	672.107	75.3539	-3.15694	C GO:0016021 integral component of membrane,F GO:0008234 cysteine-type peptidase activity,F GO:0022857 transmembrane transporter activity,F GO:0032440 2-alkenal reductase [NAD(P)] activity,P GO:0006508 proteolysis,P GO:0055085 transmembrane transport,P GO:0055114 oxidation-reduction process	EC:1.3.1.74; EC:3.4
151	XLOC_017696	Ca_14594	Ca6:27635844-27636312	64.6223	14.0095	-2.20563
152	XLOC_019593	Ca_16695	Ca6:26669228-26669696	63.338	9.55711	-2.72842
153	XLOC_019871	Ca_19814	Ca6:36741805-36743263	125.81	28.7489	-2.12967	F GO:0016758 transferase activity, transferring hexosyl groups,P GO:0008152 metabolic process
154	XLOC_019872	Ca_19813	Ca6:36764504-36770525	109.395	24.1945	-2.17679	F GO:0004497 monooxygenase activity,F GO:0005506 iron ion binding,F GO:0016705 oxidoreductase activity, acting on paired donors, with incorporation or reduction of molecular oxygen,F GO:0020037 heme binding,P GO:0055114 oxidation-reduction process
155	XLOC_020340	Ca_17430	Ca6:56992227-56994172	24.4465	5.76624	-2.08393
156	XLOC_020417	Ca_15382	Ca6:58465296-58471705	145.266	12.651	-3.52138	C GO:0009507 chloroplast,F GO:0008878 glucose-1-phosphate adenylyltransferase activity,P GO:0005978 glycogen biosynthetic process,P GO:0019252 starch biosynthetic process	EC:2.7.7.27
157	XLOC_021139	Ca_06702	Ca7:6520223-6522883	13.9664	3.08532	-2.17847
158	XLOC_021175	Ca_06635	Ca7:7256805-7264949	35.0869	6.96215	-2.33333	C GO:0016021 integral component of membrane,F GO:0005242 inward rectifier potassium channel activity,F GO:0042802 identical protein binding,P GO:0006826 iron ion transport,P GO:0007155 cell adhesion,P GO:0009414 response to water deprivation,P GO:0009651 response to salt stress,P GO:0010014 meristem initiation,P GO:0010090 trichome morphogenesis,P GO:0010106 cellular response to iron ion starvati…
159	XLOC_021349	Ca_12825	Ca7:10684395-10689774	73.8558	16.4158	-2.16963	C GO:0005622 intracellular,F GO:0003677 DNA binding,P GO:0000160 phosphorelay signal transduction system
160	XLOC_021710	Ca_14493,Ca_14497	Ca7:21191776-21273621	40.4457	8.89081	-2.1856
161	XLOC_021954	Ca_10140	Ca7:31182340-31185636	39.2681	4.96956	-2.98217	C GO:0005622 intracellular,F GO:0004553 hydrolase activity, hydrolyzing O-glycosyl compounds,F GO:0004871 signal transducer activity,P GO:0000160 phosphorelay signal transduction system,P GO:0005975 carbohydrate metabolic process
162	XLOC_022736	Ca_06777	Ca7:5811211-5813176	63.6525	10.0366	-2.66495	F GO:0009824 AMP dimethylallyltransferase activity,P GO:0008033 tRNA processing	EC:2.5.1.27
163	XLOC_023629	Ca_10055,Ca_10056,Ca_10057	Ca7:32126828-32163041	1328.09	212.604	-2.64312
164	XLOC_023631	Ca_10054	Ca7:32199698-32204448	313.722	39.5026	-2.98947	F GO:0016702 oxidoreductase activity, acting on single donors with incorporation of molecular oxygen, incorporation of two atoms of oxygen,F GO:0046872 metal ion binding,P GO:0031408 oxylipin biosynthetic process,P GO:0055114 oxidation-reduction process	EC:1.13.11
165	XLOC_024137	-	Ca7:10970278-10971179	24.4537	4.84973	-2.33408
166	XLOC_026637	Ca_21511,Ca_21512	scaffold1281:176452-183233	27.1219	4.86495	-2.47896	F GO:0030570 pectate lyase activity,F GO:0046872 metal ion binding,P GO:0045490 pectin catabolic process	EC:4.2.2.2
167	XLOC_026896	Ca_08825	scaffold1348_1:1345510-1346065	29.8613	3.56516	-3.06624
168	XLOC_027337	Ca_21085	scaffold157:470304-470739	43.8435	3.05089	-3.84506
169	XLOC_027809	Ca_26975	scaffold1852:64489-65482	65.9232	14.1926	-2.21565	F GO:0016787 hydrolase activity,P GO:0008152 metabolic process
170	XLOC_028631	Ca_23091	scaffold26:276271-281413	20.0016	3.65663	-2.45153	F GO:0016798 hydrolase activity, acting on glycosyl bonds,P GO:0008152 metabolic process
171	XLOC_029425	-	scaffold3453:2345-2507	26.2295	5.19007	-2.33737
