# Supplementary material for: RNA-Seq analysis revealed genes associated with drought stress response in kabuli chickpea (Cicer arietinum L.)
Source: PLoS One. 2018 Jun 28;13(6):e0199774. doi: 10.1371/journal.pone.0199774 (PMC6023194; doi:10.1371/journal.pone.0199774)
Supplement: S3 Table — (XLS) [file pone.0199774.s003.xls]

## Sheet: Drought responsive genes-shoot
S3 Table: Drought responsive genes in the shoot tissues
Sno	Test_Gene_ID	Gene_ID (Reference)	Location	BSD_FPKM	HSD_FPKM	log2(fold_change)	Annotation (GO Terms)	Enzyme codes (EC)
1	XLOC_000410	Ca_00424	Ca1:3492616-3493459	144.382	587.945	2.02579
2	XLOC_000494	Ca_00597	Ca1:5093068-5093829	10.7152	66.8649	2.64159
3	XLOC_000596	Ca_07978	Ca1:7219739-7222073	4.46403	36.2679	3.02228
4	XLOC_000603	Ca_07985	Ca1:7280776-7283272	8.1511	32.6316	2.0012	C GO:0005576 extracellular region,F GO:0004601 peroxidase activity,F GO:0020037 heme binding,F GO:0046872 metal ion binding,P GO:0006979 response to oxidative stress,P GO:0042744 hydrogen peroxide catabolic process,P GO:0055114 oxidation-reduction process	EC:1.11.1.7
5	XLOC_000831	Ca_02620	Ca1:11336400-11338352	8.89518	97.1584	3.44924	C GO:0005576 extracellular region,C GO:0005618 cell wall,C GO:0016020 membrane,P GO:0009664 plant-type cell wall organization
6	XLOC_000884	Ca_02523	Ca1:12302405-12303915	131.935	989.18	2.90641
7	XLOC_001003	Ca_07081	Ca1:14529689-14530358	13.5871	99.164	2.86758
8	XLOC_001116	Ca_14788	Ca1:17454585-17461571	7.42887	31.4098	2.08	C GO:0009505 plant-type cell wall,C GO:0048046 apoplast,F GO:0004553 hydrolase activity, hydrolyzing O-glycosyl compounds,P GO:0005975 carbohydrate metabolic process,P GO:0010214 seed coat development
9	XLOC_001988	Ca_00520	Ca1:4173977-4474126	5.21105	23.1321	2.15025	C GO:0005623 cell,F GO:0009055 electron carrier activity,F GO:0015035 protein disulfide oxidoreductase activity,P GO:0019243 methylglyoxal catabolic process to D-lactate via S-lactoyl-glutathione,P GO:0045454 cell redox homeostasis,P GO:0055114 oxidation-reduction process
10	XLOC_002159	Ca_08037	Ca1:7884021-7886721	8.68934	35.1661	2.01686	C GO:0005634 nucleus,C GO:0005829 cytosol,C GO:0005886 plasma membrane,C GO:0016021 integral component of membrane,F GO:0005215 transporter activity,F GO:0016791 phosphatase activity,P GO:0006810 transport,P GO:0016126 sterol biosynthetic process,P GO:0016311 dephosphorylation,P GO:0052541 plant-type cell wall cellulose metabolic process,P GO:0052546 cell wall pectin metabolic process	EC:3.1; EC:3.1.3.41
11	XLOC_002324	Ca_02687	Ca1:10737186-10740414	30.7473	123.01	2.00024	F GO:0004747 ribokinase activity,P GO:0006014 D-ribose metabolic process,P GO:0046835 carbohydrate phosphorylation	EC:2.7.1.15
12	XLOC_002369	Ca_02602	Ca1:11486724-11492646	22.7256	93.7766	2.04491
13	XLOC_002488	Ca_14134	Ca1:13684752-13687169	8.64819	61.7835	2.83675	C GO:0005618 cell wall,C GO:0048046 apoplast,F GO:0004553 hydrolase activity, hydrolyzing O-glycosyl compounds,F GO:0016762 xyloglucan:xyloglucosyl transferase activity,P GO:0010411 xyloglucan metabolic process,P GO:0042546 cell wall biogenesis,P GO:0071555 cell wall organization	EC:2.4.1.207
14	XLOC_002527	Ca_07075	Ca1:14591682-14596085	15.1692	62.1994	2.03575
15	XLOC_002780	Ca_22360	Ca1:23154496-23158418	4.88635	36.7015	2.90901	F GO:0004252 serine-type endopeptidase activity,P GO:0006508 proteolysis	EC:3.4.21
16	XLOC_003095	Ca_23534	Ca1:37721953-37725515	7.10854	34.8366	2.29298	P GO:0009855 determination of bilateral symmetry,P GO:0009887 organ morphogenesis,P GO:0010014 meristem initiation,P GO:0010051 xylem and phloem pattern formation,P GO:0010073 meristem maintenance,P GO:0048439 flower morphogenesis,P GO:0048519 negative regulation of biological process
17	XLOC_003338	Ca_12925	Ca1:47282372-47285731	3.52041	16.1474	2.19749
18	XLOC_004378	Ca_14344	Ca2:28940203-28941353	10.8381	56.2278	2.37517
19	XLOC_004454	Ca_12471	Ca2:30898144-30933479	26.5711	162.764	2.61485	P GO:0050826 response to freezing
20	XLOC_004479	Ca_12419	Ca2:31425645-31429280	7.67921	44.8313	2.54548
21	XLOC_004563	Ca_10201	Ca2:33210618-33215196	19.8774	89.4816	2.17046	F GO:0004419 hydroxymethylglutaryl-CoA lyase activity,P GO:0008152 metabolic process	EC:4.1.3.4
22	XLOC_004886	Ca_10484	Ca2:3759103-3761788	5.14557	20.9421	2.02501	F GO:0009055 electron carrier activity
23	XLOC_004895	Ca_10466	Ca2:3903074-3905891	4.60275	21.7049	2.23745	F GO:0003979 UDP-glucose 6-dehydrogenase activity,F GO:0009055 electron carrier activity,F GO:0051287 NAD binding,P GO:0055114 oxidation-reduction process	EC:1.1.1.22
24	XLOC_005249	-	Ca2:16722774-16725480	24.064	116.959	2.28105	F GO:0008725 DNA-3-methyladenine glycosylase activity,P GO:0006284 base-excision repair	EC:3.2.2.21; EC:3.2.2.20; EC:3.2.2
25	XLOC_005635	Ca_12445	Ca2:31186621-31191234	16.037	217.161	3.75929	C GO:0048046 apoplast,F GO:0005507 copper ion binding,F GO:0052716 hydroquinone:oxygen oxidoreductase activity,P GO:0046274 lignin catabolic process,P GO:0055114 oxidation-reduction process	EC:1.10.3; EC:1.10.3.2
26	XLOC_005722	Ca_10195	Ca2:33326286-33326592	4.04225	520.308	7.00806
27	XLOC_005865	Ca_09806	Ca2:36236360-36236579	3.71268	19.9014	2.42234	C GO:0005886 plasma membrane,C GO:0016021 integral component of membrane
28	XLOC_005984	-	Ca2:25529391-25529794	6.00021	26.9802	2.16882
29	XLOC_006042	Ca_22944	Ca3:53039-61276	8.18357	33.921	2.05138	F GO:0004714 transmembrane receptor protein tyrosine kinase activity,P GO:0018108 peptidyl-tyrosine phosphorylation	EC:2.7.10; EC:2.7.10.1; EC:2.7.11
30	XLOC_006113	Ca_21344	Ca3:3700637-3702865	10.9946	65.1951	2.56797
31	XLOC_006314	Ca_22236	Ca3:12294433-12297058	35.5368	152.937	2.10556	F GO:0005524 ATP binding
32	XLOC_006481	Ca_09381	Ca3:19780657-19783886	6.36411	42.9774	2.75555
33	XLOC_006512	Ca_09430	Ca3:20328504-20329083	26.6403	119.179	2.16145
34	XLOC_006618	Ca_06208	Ca3:23014863-23016554	4.62198	24.6674	2.41602	F GO:0046872 metal ion binding,F GO:0051213 dioxygenase activity,P GO:0055114 oxidation-reduction process
35	XLOC_006916	Ca_07275	Ca3:29700612-29704256	4.46768	19.3965	2.1182	C GO:0016021 integral component of membrane,F GO:0004672 protein kinase activity,F GO:0005524 ATP binding,P GO:0006468 protein phosphorylation
36	XLOC_007156	Ca_00767	Ca3:34886013-34889828	14.8739	63.5447	2.09498	F GO:0004332 fructose-bisphosphate aldolase activity,P GO:0006096 glycolytic process	EC:4.1.2.13
37	XLOC_007295	Ca_01068,Ca_01069	Ca3:37349305-37359458	4.36156	26.3682	2.59588
38	XLOC_007512	Ca_21337,Ca_21338,Ca_21342	Ca3:3722603-3745103	8.5308	60.5112	2.82645
39	XLOC_007561	Ca_20661	Ca3:5403612-5412130	80.2503	369.157	2.20165	C GO:0031225 anchored component of membrane,P GO:0010215 cellulose microfibril organization,P GO:0016049 cell growth
40	XLOC_007650	Ca_20971	Ca3:9444248-9450511	5.01117	31.7176	2.66206	F GO:0004185 serine-type carboxypeptidase activity,P GO:0006508 proteolysis	EC:3.4.21; EC:3.4.16
41	XLOC_007856	Ca_19640	Ca3:18658183-18659832	21.1252	87.5882	2.05177
42	XLOC_008157	Ca_08294	Ca3:26029554-26031565	3.39792	14.2075	2.06393	F GO:0016747 transferase activity, transferring acyl groups other than amino-acyl groups,P GO:0009058 biosynthetic process
43	XLOC_008265	Ca_07148	Ca3:28319155-28324680	6.16454	44.5655	2.85386
44	XLOC_008328	Ca_07270	Ca3:29660920-29661127	200.592	892.493	2.15358	C GO:0016021 integral component of membrane
45	XLOC_008496	Ca_12034,Ca_12049	Ca3:32955477-33185940	244.297	1193.04	2.28793	P GO:0009834 plant-type secondary cell wall biogenesis
46	XLOC_008697	Ca_00998	Ca3:36748092-36755139	3.74005	79.4565	4.40904	F GO:0004553 hydrolase activity, hydrolyzing O-glycosyl compounds,P GO:0005975 carbohydrate metabolic process
47	XLOC_008711	Ca_01026	Ca3:36978617-36980543	49.7106	266.912	2.42474	F GO:0016757 transferase activity, transferring glycosyl groups,P GO:0008152 metabolic process
48	XLOC_008912	-	Ca3:5228236-5228411	3.91633	222.209	5.82627
49	XLOC_009070	-	Ca3:36761953-36763104	3.85003	19.3673	2.33068
50	XLOC_009746	Ca_04551	Ca4:13282777-13287417	8.3574	135.197	4.01587
51	XLOC_009752	Ca_04564	Ca4:13420571-13421974	7.97648	38.054	2.25422	F GO:0005199 structural constituent of cell wall
52	XLOC_009886	Ca_05511	Ca4:15956235-15957042	5.28355	24.8832	2.23559	F GO:0046872 metal ion binding
53	XLOC_010106	Ca_20140	Ca4:22010445-22018868	4.65248	44.8705	3.26969
54	XLOC_010198	Ca_16612	Ca4:26166943-26172962	9.55615	127.333	3.73604	F GO:0030570 pectate lyase activity,F GO:0046872 metal ion binding,P GO:0045490 pectin catabolic process	EC:4.2.2.2
55	XLOC_010455	Ca_15135,Ca_15136	Ca4:37405973-37420683	5.16588	22.3317	2.11201	C GO:0005622 intracellular,P GO:0009407 toxin catabolic process,P GO:0009723 response to ethylene,P GO:0009738 abscisic acid-activated signaling pathway,P GO:0010583 response to cyclopentenone,P GO:0019243 methylglyoxal catabolic process to D-lactate via S-lactoyl-glutathione,P GO:0035556 intracellular signal transduction
56	XLOC_010461	Ca_15126	Ca4:37542077-37543275	64.1957	295.1	2.20066	C GO:0005622 intracellular,P GO:0009407 toxin catabolic process,P GO:0009723 response to ethylene,P GO:0009738 abscisic acid-activated signaling pathway,P GO:0010583 response to cyclopentenone,P GO:0019243 methylglyoxal catabolic process to D-lactate via S-lactoyl-glutathione,P GO:0035556 intracellular signal transduction
57	XLOC_010466	Ca_15109,Ca_15110	Ca4:37703294-37716405	30.6751	136.042	2.1489	C GO:0005743 mitochondrial inner membrane,C GO:0016021 integral component of membrane,C GO:0070469 respiratory chain,F GO:0004129 cytochrome-c oxidase activity,F GO:0005507 copper ion binding,P GO:0022900 electron transport chain,P GO:1902600 hydrogen ion transmembrane transport	EC:1.9.3.1
58	XLOC_010654	Ca_23689	Ca4:43437695-43442738	10.0547	43.5374	2.11438
59	XLOC_010656	Ca_23692	Ca4:43475835-43480281	4.33593	46.8986	3.43513
60	XLOC_010772	Ca_19272	Ca4:46419615-46421449	10.8135	61.6637	2.51159	C GO:0005634 nucleus,F GO:0003677 DNA binding,P GO:0010067 procambium histogenesis
61	XLOC_010844	Ca_10768,Ca_10792	Ca4:47963864-48187843	894.756	7661.35	3.09803
62	XLOC_010945	Ca_07724	Ca4:891700-896967	5.65414	25.9316	2.19733	C GO:0005634 nucleus,P GO:0006260 DNA replication
63	XLOC_011699	Ca_05547	Ca4:15538913-15543410	3.33481	37.8537	3.50476	F GO:0046872 metal ion binding
64	XLOC_011929	Ca_20147	Ca4:21881580-21885175	27.1086	114.463	2.07805	C GO:0016021 integral component of membrane,F GO:0004672 protein kinase activity,F GO:0005524 ATP binding,P GO:0006468 protein phosphorylation
65	XLOC_012379	Ca_14876	Ca4:40488808-40492902	3.56105	34.737	3.2861
66	XLOC_012620	Ca_10840	Ca4:47464248-47464599	144.128	610.442	2.08251	F GO:0016757 transferase activity, transferring glycosyl groups,P GO:0008152 metabolic process
67	XLOC_012621	-	Ca4:47467961-47468071	3013.1	20121.3	2.7394
68	XLOC_012891	-	Ca4:33286520-33286612	1520.27	150600	6.63025
69	XLOC_013756	Ca_04853	Ca5:31504322-31511792	18.8101	97.1327	2.36845	F GO:0005507 copper ion binding,F GO:0016491 oxidoreductase activity,P GO:0055114 oxidation-reduction process
70	XLOC_013837	Ca_04993	Ca5:32965237-32967150	721.961	3030.28	2.06946	C GO:0005737 cytoplasm,C GO:0005874 microtubule,C GO:0043234 protein complex,F GO:0003924 GTPase activity,F GO:0005200 structural constituent of cytoskeleton,F GO:0005525 GTP binding,P GO:0007017 microtubule-based process,P GO:0008152 metabolic process,P GO:0051258 protein polymerization	EC:3.6.1; EC:3.6.1.15
71	XLOC_013957	Ca_01707	Ca5:35298440-35304119	4.69043	21.2194	2.1776	F GO:0009055 electron carrier activity
72	XLOC_013982	Ca_01653	Ca5:35740490-35740964	98.2946	406.989	2.0498
73	XLOC_014112	Ca_01399	Ca5:38194237-38198064	20.2929	93.7512	2.20786	F GO:0004185 serine-type carboxypeptidase activity,P GO:0006508 proteolysis	EC:3.4.21; EC:3.4.16
74	XLOC_014215	Ca_07589	Ca5:40694886-40705247	12.2619	73.9338	2.59206	F GO:0004185 serine-type carboxypeptidase activity,F GO:0004553 hydrolase activity, hydrolyzing O-glycosyl compounds,P GO:0005975 carbohydrate metabolic process,P GO:0006508 proteolysis	EC:3.4.21; EC:3.4.16
75	XLOC_014373	Ca_12680	Ca5:43712963-43722227	18.6493	93.8331	2.33098	C GO:0016021 integral component of membrane,F GO:0008271 secondary active sulfate transmembrane transporter activity,P GO:1902358 sulfate transmembrane transport
76	XLOC_015110	Ca_17683	Ca5:23671962-23672298	18.3227	20865.3	10.1533	C GO:0005739 mitochondrion
77	XLOC_015235	-	Ca5:27325736-27540807	3.3913	19.1469	2.4972	C GO:0016021 integral component of membrane,F GO:0004672 protein kinase activity,F GO:0005524 ATP binding,P GO:0006468 protein phosphorylation
78	XLOC_015236	-	Ca5:27325736-27540807	4.15187	18.2714	2.13775	C GO:0016021 integral component of membrane,F GO:0004672 protein kinase activity,F GO:0005524 ATP binding,P GO:0006468 protein phosphorylation
79	XLOC_015286	Ca_13375,Ca_13376	Ca5:28489919-28512176	4.04826	81.3248	4.32832	C GO:0048046 apoplast,F GO:0005507 copper ion binding,F GO:0052716 hydroquinone:oxygen oxidoreductase activity,P GO:0046274 lignin catabolic process,P GO:0055114 oxidation-reduction process	EC:1.10.3; EC:1.10.3.2
80	XLOC_015296	Ca_13361	Ca5:28682540-28688007	4.02911	17.2865	2.10111	P GO:0010413 glucuronoxylan metabolic process,P GO:0045492 xylan biosynthetic process
81	XLOC_015409	Ca_04788	Ca5:30904918-30907690	30.2224	312.136	3.36848
82	XLOC_016324	-	Ca5:12323707-12323802	2584.9	173334	6.0673
83	XLOC_016368	-	Ca5:23663821-23664576	3.05897	1147.9	8.55173	C GO:0005739 mitochondrion
84	XLOC_017300	Ca_06315	Ca6:16899212-16901938	36.4975	354.56	3.28016	F GO:0005199 structural constituent of cell wall
85	XLOC_017443	Ca_16377	Ca6:20556670-20558435	10.5325	57.8058	2.45637	C GO:0005576 extracellular region,C GO:0005618 cell wall,C GO:0016020 membrane,P GO:0009664 plant-type cell wall organization
86	XLOC_017453	Ca_16357	Ca6:20750139-20756797	7.40997	38.1286	2.36333	C GO:0005576 extracellular region,C GO:0005618 cell wall,C GO:0005871 kinesin complex,C GO:0005874 microtubule,C GO:0016020 membrane,F GO:0003777 microtubule motor activity,F GO:0005524 ATP binding,F GO:0008017 microtubule binding,P GO:0007018 microtubule-based movement,P GO:0008152 metabolic process,P GO:0009664 plant-type cell wall organization	EC:3.6.1; EC:3.6.1.15
87	XLOC_017610	Ca_11034	Ca6:24313911-24316671	3.84611	19.2388	2.32255	C GO:0031225 anchored component of membrane,P GO:0009664 plant-type cell wall organization,P GO:0010075 regulation of meristem growth,P GO:0042545 cell wall modification,P GO:0048653 anther development
88	XLOC_017737	Ca_17458	Ca6:29195514-29197328	3.68103	26.4381	2.84443
89	XLOC_017871	Ca_15814	Ca6:34622152-34623481	18.6285	140.201	2.91191
90	XLOC_018130	-	Ca6:48922124-48927212	3.15432	32.751	3.37614
91	XLOC_018249	-	Ca6:52629335-52631166	3.86443	20.6536	2.41807	F GO:0009055 electron carrier activity
92	XLOC_018478	Ca_13265	Ca6:400309-403969	27.7742	214.086	2.94637	C GO:0005819 spindle,C GO:0005874 microtubule,P GO:0032147 activation of protein kinase activity,P GO:0060236 regulation of mitotic spindle organization
93	XLOC_018719	Ca_05754	Ca6:5464091-5465462	4.43559	45.225	3.34992	C GO:0016021 integral component of membrane,F GO:0005215 transporter activity,P GO:0006810 transport
94	XLOC_018772	Ca_16914	Ca6:6522358-6526274	11.2688	70.8782	2.65301	C GO:0005622 intracellular,C GO:0016021 integral component of membrane,F GO:0005215 transporter activity,P GO:0006810 transport
95	XLOC_018909	Ca_08667	Ca6:9322809-9328413	3.55572	21.3293	2.58463
96	XLOC_019065	Ca_05088	Ca6:13177649-13179983	4.51858	24.296	2.42678
97	XLOC_019151	Ca_05236	Ca6:14666497-14668151	25.7965	157.516	2.61025	F GO:0008289 lipid binding,P GO:0006869 lipid transport
98	XLOC_019282	Ca_06367	Ca6:17524459-17526556	8.17995	67.1502	3.03723	C GO:0005622 intracellular,C GO:0005886 plasma membrane,F GO:0005525 GTP binding,P GO:0007015 actin filament organization,P GO:0007264 small GTPase mediated signal transduction,P GO:0009832 plant-type cell wall biogenesis,P GO:0010413 glucuronoxylan metabolic process,P GO:0045492 xylan biosynthetic process
99	XLOC_019396	Ca_16354	Ca6:20768589-20772681	26.8788	123.25	2.19705
100	XLOC_019602	Ca_16712	Ca6:26815027-26820510	4.16084	30.3712	2.86776	C GO:0016021 integral component of membrane,F GO:0005215 transporter activity,P GO:0006810 transport
101	XLOC_019655	Ca_26118	Ca6:28268895-28272914	89.3107	362.318	2.02035	C GO:0016021 integral component of membrane,P GO:0008643 carbohydrate transport
102	XLOC_020068	-	Ca6:47005808-47010318	5.23792	24.4438	2.2224
103	XLOC_020254	Ca_18917	Ca6:53893968-53944950	21.65	123.029	2.50656	F GO:0008422 beta-glucosidase activity,P GO:0005975 carbohydrate metabolic process	EC:3.2.1.21; EC:3.2.1
104	XLOC_020439	Ca_18876	Ca6:58938384-58938693	8.34269	43.5631	2.38452	P GO:0009733 response to auxin
105	XLOC_020588	-	Ca6:21476834-21480567	3.59665	3023.18	9.7152	C GO:0005739 mitochondrion
106	XLOC_020604	-	Ca6:26480512-26480746	6.37219	1819.12	8.15723
107	XLOC_021027	Ca_03005	Ca7:4487493-4487727	94.0802	379.246	2.01117
108	XLOC_021118	Ca_06731	Ca7:6275491-6278951	3.23323	15.3822	2.25022	C GO:0016020 membrane,F GO:0016798 hydrolase activity, acting on glycosyl bonds,P GO:0005975 carbohydrate metabolic process
109	XLOC_021394	Ca_09325	Ca7:11722173-11724334	38.4165	156.765	2.0288
110	XLOC_021444	Ca_09240	Ca7:12790329-12794585	9.28014	141.181	3.92725	F GO:0005507 copper ion binding,F GO:0008447 L-ascorbate oxidase activity,P GO:0055114 oxidation-reduction process	EC:1.10.3; EC:1.10.3.3
111	XLOC_021543	Ca_09947	Ca7:15065717-15077306	13.6648	56.3678	2.0444
112	XLOC_021892	Ca_11787	Ca7:29176243-29184531	6.63296	30.4789	2.20009	C GO:0016021 integral component of membrane,P GO:0055114 oxidation-reduction process
113	XLOC_022054	Ca_16195	Ca7:33885951-33887941	7.77425	31.5893	2.02266
114	XLOC_022059	Ca_21006	Ca7:34128577-34167676	8.54579	34.1836	2.00002	F GO:0003677 DNA binding,F GO:0003899 DNA-directed RNA polymerase activity,F GO:0032549 ribonucleoside binding,P GO:0006351 transcription, DNA-templated	EC:2.7.7.6
115	XLOC_022582	Ca_03148	Ca7:3203021-3203825	8.20546	49.5058	2.59294
116	XLOC_022714	Ca_06818	Ca7:5472080-5479655	4.55259	29.8332	2.71216	C GO:0005789 endoplasmic reticulum membrane
117	XLOC_022864	Ca_13196	Ca7:8174089-8179477	4.27644	28.9135	2.75726	F GO:0004497 monooxygenase activity,F GO:0005506 iron ion binding,F GO:0016705 oxidoreductase activity, acting on paired donors, with incorporation or reduction of molecular oxygen,F GO:0020037 heme binding,P GO:0055114 oxidation-reduction process
118	XLOC_022865	Ca_13195	Ca7:8185468-8192550	12.8757	55.4824	2.10737	F GO:0005524 ATP binding,P GO:0019538 protein metabolic process
119	XLOC_023115	Ca_23045	Ca7:14342577-14349032	3.18135	30.1351	3.24373	F GO:0004565 beta-galactosidase activity,F GO:0030246 carbohydrate binding,P GO:0005975 carbohydrate metabolic process	EC:3.2.1.23; EC:3.2.1
120	XLOC_023154	Ca_09923	Ca7:15307849-15310878	3.45273	17.0183	2.30128	C GO:0005739 mitochondrion
121	XLOC_023434	Ca_16249	Ca7:26701105-26702150	3.97043	3408	9.74542	C GO:0005739 mitochondrion
122	XLOC_023476	Ca_18941	Ca7:28520092-28521157	4.79095	33.2124	2.79334	C GO:0031012 extracellular matrix,C GO:0031225 anchored component of membrane,F GO:0004222 metalloendopeptidase activity,F GO:0008270 zinc ion binding,P GO:0006508 proteolysis	EC:3.4.24
123	XLOC_024668	Ca_02001	Ca8:5437161-5444918	3.15719	14.2388	2.17311	C GO:0005623 cell,F GO:0015035 protein disulfide oxidoreductase activity,P GO:0006662 glycerol ether metabolic process,P GO:0045454 cell redox homeostasis,P GO:0055114 oxidation-reduction process
124	XLOC_024714	Ca_01927	Ca8:6189162-6194638	3.0043	12.9913	2.11244
125	XLOC_025014	Ca_12975	Ca8:14982854-14992283	20.5253	85.0035	2.05012	F GO:0043565 sequence-specific DNA binding
126	XLOC_025117	Ca_11876	Ca8:595759-599825	5.54074	25.601	2.20805	F GO:0003824 catalytic activity,P GO:0008152 metabolic process
127	XLOC_025413	Ca_01935	Ca8:6112186-6116887	9.74489	83.9895	3.10749	C GO:0005576 extracellular region,F GO:0004601 peroxidase activity,F GO:0020037 heme binding,F GO:0046872 metal ion binding,P GO:0006979 response to oxidative stress,P GO:0042744 hydrogen peroxide catabolic process,P GO:0055114 oxidation-reduction process	EC:1.11.1.7
128	XLOC_025936	-	scaffold1006:218757-223050	6.09684	35.8085	2.55417	F GO:0003677 DNA binding
129	XLOC_026535	Ca_24666	scaffold1202:177619-253529	3.12604	588.018	7.55538
130	XLOC_026833	Ca_08691	scaffold1348_1:23727-28716	6.79344	36.2928	2.41747	C GO:0005774 vacuolar membrane,C GO:0009505 plant-type cell wall,C GO:0009506 plasmodesma,C GO:0046658 anchored component of plasma membrane,C GO:0048046 apoplast,F GO:0005507 copper ion binding,F GO:0016491 oxidoreductase activity,P GO:0000271 polysaccharide biosynthetic process,P GO:0009825 multidimensional cell growth,P GO:0009932 cell tip growth,P GO:0010817 regulation of hormone levels,P GO:…
131	XLOC_026875	Ca_08790	scaffold1348_1:869648-1173100	6.01867	52.1231	3.11441	F GO:0030570 pectate lyase activity,F GO:0046872 metal ion binding,P GO:0045490 pectin catabolic process	EC:4.2.2.2
132	XLOC_027088	Ca_25540	scaffold1414:149285-150968	5.24708	6273.36	10.2235
133	XLOC_027351	-	scaffold157:229014-229196	6.15218	313.705	5.67216	C GO:0009507 chloroplast,F GO:0000287 magnesium ion binding,F GO:0016984 ribulose-bisphosphate carboxylase activity,P GO:0015977 carbon fixation,P GO:0015979 photosynthesis	EC:4.1.1.39
134	XLOC_027563	-	scaffold1708:81330-82314	3.00362	15.9125	2.40539
135	XLOC_027711	Ca_28211	scaffold1776:2203-2365	152.703	160127	10.0343
136	XLOC_027788	Ca_24137	scaffold1844:60142-62045	100.304	474.244	2.24125	C GO:0016021 integral component of membrane,F GO:0005215 transporter activity,P GO:0006810 transport
137	XLOC_028344	Ca_25191	scaffold227:142815-143256	9.50919	17684.9	10.8609	C GO:0016021 integral component of membrane
138	XLOC_028429	Ca_26721	scaffold2368:59488-59788	4.13102	34.7838	3.07385
139	XLOC_028893	Ca_28034	scaffold2888:755-1141	13.1455	27237.8	11.0168
140	XLOC_029412	Ca_25602	scaffold3422:92501-95745	43.8152	287.689	2.71501	F GO:0005524 ATP binding,F GO:0051082 unfolded protein binding,P GO:0006457 protein folding,P GO:0006950 response to stress
141	XLOC_029416	-	scaffold3422:96719-96872	5.66329	188.554	5.0572	F GO:0005524 ATP binding,F GO:0051082 unfolded protein binding,P GO:0006457 protein folding,P GO:0006950 response to stress
142	XLOC_029426	Ca_11938,Ca_11942	scaffold346_1:8317-75292	3.27404	15.5083	2.2439	C GO:0005618 cell wall,C GO:0048046 apoplast,F GO:0004553 hydrolase activity, hydrolyzing O-glycosyl compounds,F GO:0016762 xyloglucan:xyloglucosyl transferase activity,P GO:0010411 xyloglucan metabolic process,P GO:0042546 cell wall biogenesis,P GO:0071555 cell wall organization	EC:2.4.1.207
143	XLOC_029691	Ca_26968	scaffold3945:189-6602	7.29873	4948.51	9.40513	C GO:0005739 mitochondrion
144	XLOC_029955	Ca_22212	scaffold420:333974-343325	16.8217	161.21	3.26055	F GO:0004553 hydrolase activity, hydrolyzing O-glycosyl compounds,P GO:0005975 carbohydrate metabolic process
145	XLOC_029993	-	scaffold4287:1938-2760	3.38427	1741.46	9.00724	C GO:0005739 mitochondrion
146	XLOC_030046	Ca_26056	scaffold4452:66769-77857	3.02531	12.8485	2.08645
147	XLOC_030310	Ca_25362	scaffold498:133413-137945	35.4102	222.603	2.65223	C GO:0048046 apoplast,F GO:0005507 copper ion binding,F GO:0052716 hydroquinone:oxygen oxidoreductase activity,P GO:0046274 lignin catabolic process,P GO:0055114 oxidation-reduction process	EC:1.10.3; EC:1.10.3.2
148	XLOC_030315	Ca_25364	scaffold498:154079-157200	15.2956	173.453	3.50335	C GO:0048046 apoplast,F GO:0005507 copper ion binding,F GO:0052716 hydroquinone:oxygen oxidoreductase activity,P GO:0046274 lignin catabolic process,P GO:0055114 oxidation-reduction process	EC:1.10.3; EC:1.10.3.2
149	XLOC_030418	-	scaffold528:330028-330185	8.90653	637.536	6.1615	C GO:0009535 chloroplast thylakoid membrane,C GO:0016021 integral component of membrane,F GO:0008137 NADH dehydrogenase (ubiquinone) activity,F GO:0048038 quinone binding,P GO:0006810 transport,P GO:0055114 oxidation-reduction process	EC:1.6.99.5; EC:1.6.99.3; EC:1.6.5.3
150	XLOC_030991	Ca_20165	scaffold674:349732-352330	5.89886	28.1653	2.25541
151	XLOC_031094	-	scaffold7:152888-152954	13285.9	482208	5.18169
152	XLOC_031347	Ca_27918	scaffold7887:749-1484	5.92495	26.6303	2.16819
153	XLOC_032061	Ca_28108	scaffold999:77446-81021	3.07944	881.866	8.16175	C GO:0009507 chloroplast,F GO:0003723 RNA binding,P GO:0006397 mRNA processing,P GO:0008033 tRNA processing,P GO:0008380 RNA splicing
154	XLOC_000171	Ca_27310,Ca_27311	C11180336:379-8216	62.383	9.78257	-2.67287
155	XLOC_000317	Ca_00255	Ca1:2022037-2023255	2276.49	366.357	-2.63549
156	XLOC_000349	Ca_00317	Ca1:2542241-2543014	79.7761	15.5414	-2.35984
157	XLOC_000552	Ca_07894	Ca1:6342978-6343290	76.2902	11.2723	-2.75872
158	XLOC_001123	Ca_14775,Ca_14777	Ca1:17585231-17601940	790.632	60.3287	-3.71209	P GO:0006952 defense response,P GO:0009607 response to biotic stimulus
159	XLOC_001124	Ca_14776	Ca1:17585231-17601940	117.393	12.4532	-3.23676	P GO:0006952 defense response,P GO:0009607 response to biotic stimulus
160	XLOC_001163	Ca_17387	Ca1:18657393-18661736	258.803	35.7424	-2.85615	F GO:0004497 monooxygenase activity,F GO:0005506 iron ion binding,F GO:0016705 oxidoreductase activity, acting on paired donors, with incorporation or reduction of molecular oxygen,F GO:0020037 heme binding,P GO:0055114 oxidation-reduction process
161	XLOC_001857	Ca_00232	Ca1:1848874-1850254	47.9407	6.24787	-2.93981
162	XLOC_001864	Ca_00243	Ca1:1947053-1949862	96.195	4.28361	-4.48906	C GO:0009535 chloroplast thylakoid membrane,C GO:0016021 integral component of membrane
163	XLOC_001955	Ca_00449	Ca1:3686095-3689629	49.05	8.02265	-2.6121	F GO:0016788 hydrolase activity, acting on ester bonds,F GO:0052886 9,9'-dicis-carotene:quinone oxidoreductase activity,F GO:0052887 7,9,9'-tricis-neurosporene:quinone oxidoreductase activity,P GO:0052889 9,9'-di-cis-zeta-carotene desaturation to 7,9,7',9'-tetra-cis-lycopene,P GO:0055114 oxidation-reduction process	EC:1.3.5.6								9,9'-dicis-carotene:quinone oxidoreductase activity
164	XLOC_001973	Ca_00488	Ca1:4057780-4058431	40.3066	9.02486	-2.15904
165	XLOC_002215	Ca_02883	Ca1:9114873-9119313	265.123	55.8262	-2.24765
166	XLOC_002332	Ca_02674	Ca1:10840017-10846053	72.1032	14.8636	-2.27828
167	XLOC_002641	Ca_06873	Ca1:16960750-16964288	69.5463	16.9072	-2.04033
168	XLOC_003527	-	Ca1:37643201-37643347	261.772	50.9371	-2.36152
169	XLOC_004328	Ca_17277,Ca_17280	Ca2:26904483-26947281	39.0179	4.40554	-3.14675	F GO:0008171 O-methyltransferase activity,F GO:0046983 protein dimerization activity,P GO:0032259 methylation	EC:2.1.1
170	XLOC_004591	Ca_15236	Ca2:34131921-34135043	48.5648	6.11591	-2.98927	C GO:0005634 nucleus,F GO:0003677 DNA binding,F GO:0003700 transcription factor activity, sequence-specific DNA binding,P GO:0005992 trehalose biosynthetic process,P GO:0006351 transcription, DNA-templated,P GO:0006355 regulation of transcription, DNA-templated,P GO:0006561 proline biosynthetic process,P GO:0009627 systemic acquired resistance,P GO:0009718 anthocyanin-containing compound biosynth…
171	XLOC_004908	Ca_21107	Ca2:4328986-4373243	43.3977	6.80934	-2.67203	F GO:0016758 transferase activity, transferring hexosyl groups,P GO:0008152 metabolic process
172	XLOC_005168	Ca_18090	Ca2:12745798-12747551	26.8239	5.3307	-2.33112	C GO:0005634 nucleus,F GO:0003677 DNA binding,P GO:0006351 transcription, DNA-templated,P GO:0006355 regulation of transcription, DNA-templated
173	XLOC_005654	-	Ca2:31725523-31728119	12912.5	1958.64	-2.72084
174	XLOC_005660	Ca_17840	Ca2:31792793-31794311	1051.23	42.1176	-4.64151
175	XLOC_005859	Ca_09797	Ca2:36172410-36173523	52.1344	6.73015	-2.95352
176	XLOC_005860	Ca_09798	Ca2:36183189-36184302	29.5653	4.79232	-2.62511
177	XLOC_006540	Ca_09482	Ca3:21198283-21211592	16179.8	3629.75	-2.15625	F GO:0008233 peptidase activity,F GO:0008289 lipid binding,P GO:0006508 proteolysis,P GO:0006869 lipid transport
178	XLOC_006567	Ca_09533	Ca3:21816590-21818952	78.0358	3.26118	-4.58067	F GO:0016491 oxidoreductase activity,F GO:0050662 coenzyme binding,P GO:0006952 defense response,P GO:0009813 flavonoid biosynthetic process,P GO:0055114 oxidation-reduction process
179	XLOC_006756	Ca_08264,Ca_08265	Ca3:26393782-26438352	166.047	15.1937	-3.45005	F GO:0008429 phosphatidylethanolamine binding,P GO:0009909 regulation of flower development,P GO:0048573 photoperiodism, flowering
180	XLOC_006923	Ca_07289	Ca3:29805467-29806347	94.0132	22.4964	-2.06317
181	XLOC_007144	Ca_00748	Ca3:34727631-34730993	75.0176	14.1831	-2.40305	C GO:0016021 integral component of membrane
182	XLOC_007190	Ca_00833	Ca3:35508012-35508992	21.6243	5.12498	-2.07704
183	XLOC_007241	Ca_00955	Ca3:36422618-36423197	32.0035	6.63753	-2.26951	C GO:0005795 Golgi stack,C GO:0016021 integral component of membrane,F GO:0020037 heme binding,P GO:0006778 porphyrin-containing compound metabolic process
184	XLOC_007749	Ca_22495	Ca3:15015489-15017337	58.5762	4.85681	-3.59223	F GO:0016758 transferase activity, transferring hexosyl groups,P GO:0008152 metabolic process
185	XLOC_008358	Ca_07338	Ca3:30235311-30235884	271.715	23.8221	-3.51172
186	XLOC_008558	Ca_00743	Ca3:34682642-34683683	28.2878	5.67948	-2.31635	F GO:0016787 hydrolase activity,P GO:0008152 metabolic process
187	XLOC_008606	Ca_00843	Ca3:35593119-35593803	29.7808	6.7476	-2.14194
188	XLOC_009672	Ca_04405	Ca4:11847174-11847966	266.523	24.0491	-3.47021	C GO:0005615 extracellular space,F GO:0004568 chitinase activity,P GO:0000272 polysaccharide catabolic process,P GO:0006032 chitin catabolic process	EC:3.2.1.14
189	XLOC_009838	Ca_05612,Ca_05613	Ca4:14870101-14890673	269.013	32.1474	-3.0649
190	XLOC_010412	Ca_14855	Ca4:36078704-36081818	16.2205	3.0437	-2.41392
191	XLOC_010746	Ca_18392	Ca4:45696898-45697823	139.114	32.4592	-2.09957	C GO:0005576 extracellular region,F GO:0008083 growth factor activity,P GO:0008283 cell proliferation
192	XLOC_010839	Ca_10799	Ca4:47921560-47923044	86.8816	15.0028	-2.53382
193	XLOC_011006	Ca_07839	Ca4:2179646-2180447	40.9149	7.11146	-2.52441	F GO:0004190 aspartic-type endopeptidase activity,P GO:0006508 proteolysis	EC:3.4.23
194	XLOC_011161	Ca_03757	Ca4:4982512-4983028	61.5732	10.0623	-2.61334	P GO:0042742 defense response to bacterium,P GO:0050832 defense response to fungus
195	XLOC_012449	Ca_10900	Ca4:42358911-42359325	23.2186	3.18639	-2.86529
196	XLOC_013053	Ca_24943	Ca5:3721260-3722682	34.8752	6.30206	-2.46831	F GO:0016747 transferase activity, transferring acyl groups other than amino-acyl groups,P GO:0008152 metabolic process
197	XLOC_013831	-	Ca5:32799092-32800156	24.4646	4.22301	-2.53436
198	XLOC_013848	Ca_05018	Ca5:33254989-33262526	52.9329	6.05034	-3.12908	C GO:0005737 cytoplasm,C GO:0005874 microtubule,C GO:0043234 protein complex,F GO:0003924 GTPase activity,F GO:0004568 chitinase activity,F GO:0005200 structural constituent of cytoskeleton,F GO:0005525 GTP binding,P GO:0005975 carbohydrate metabolic process,P GO:0006032 chitin catabolic process,P GO:0007017 microtubule-based process,P GO:0051258 protein polymerization	EC:3.6.1; EC:3.2.1.14; EC:3.6.1.15
199	XLOC_014493	-	Ca5:45927754-45928449	236.967	27.73	-3.09517
200	XLOC_014538	Ca_04125	Ca5:46667054-46669148	345.042	22.3474	-3.9486	C GO:0005576 extracellular region,F GO:0004601 peroxidase activity,F GO:0020037 heme binding,F GO:0046872 metal ion binding,P GO:0006979 response to oxidative stress,P GO:0042744 hydrogen peroxide catabolic process,P GO:0055114 oxidation-reduction process	EC:1.11.1.7
201	XLOC_015398	Ca_04763	Ca5:30675010-30751945	39.3045	6.40156	-2.6182
202	XLOC_015442	Ca_04846	Ca5:31428280-31428544	31.4747	3.77379	-3.06011
203	XLOC_015454	Ca_04874,Ca_04875	Ca5:31693761-31717294	148.932	36.5573	-2.02643	C GO:0005739 mitochondrion,C GO:0009536 plastid
204	XLOC_015604	-	Ca5:34550087-34554159	27.7277	6.2622	-2.14659
205	XLOC_015816	Ca_07423	Ca5:38728524-38730845	125.62	12.1732	-3.36729	F GO:0008234 cysteine-type peptidase activity,P GO:0006508 proteolysis	EC:3.4
206	XLOC_015937	Ca_19239	Ca5:41350192-41379767	30.6071	4.77335	-2.68079	C GO:0016021 integral component of membrane,F GO:0005315 inorganic phosphate transmembrane transporter activity,P GO:0006817 phosphate ion transport,P GO:0055085 transmembrane transport
207	XLOC_016739	Ca_05815	Ca6:4813994-4817645	28.1295	3.32903	-3.07891	F GO:0003700 transcription factor activity, sequence-specific DNA binding,F GO:0043565 sequence-specific DNA binding,P GO:0006355 regulation of transcription, DNA-templated
208	XLOC_016864	Ca_09664	Ca6:7195435-7196989	93.9543	23.049	-2.02725
209	XLOC_017319	Ca_06357,Ca_06358	Ca6:17441694-17448366	183.135	38.9249	-2.23414	F GO:0004497 monooxygenase activity,F GO:0005506 iron ion binding,F GO:0016705 oxidoreductase activity, acting on paired donors, with incorporation or reduction of molecular oxygen,F GO:0020037 heme binding,P GO:0055114 oxidation-reduction process
210	XLOC_017500	Ca_11276	Ca6:21638377-21646447	17.5588	4.24865	-2.04712	C GO:0005623 cell,F GO:0009055 electron carrier activity,F GO:0015035 protein disulfide oxidoreductase activity,P GO:0045454 cell redox homeostasis,P GO:0055114 oxidation-reduction process
211	XLOC_017774	-	Ca6:30919226-30920325	258.235	49.3512	-2.38753
212	XLOC_017928	Ca_19561	Ca6:38222153-38223872	1729.56	128.685	-3.74849
213	XLOC_018412	-	Ca6:58367452-58370588	46.8019	3.05276	-3.93838
214	XLOC_018966	Ca_08560	Ca6:10276854-10278906	27.2971	4.24535	-2.68479	P GO:0006950 response to stress,P GO:0009228 thiamine biosynthetic process
215	XLOC_019081	Ca_05112	Ca6:13394404-13396030	39.3485	4.52464	-3.12043	F GO:0005506 iron ion binding,F GO:0020037 heme binding,F GO:0070330 aromatase activity,P GO:0055114 oxidation-reduction process	EC:1.14.14.1; EC:1.14.14
216	XLOC_019115	Ca_05173	Ca6:14069292-14071155	25.9444	6.05882	-2.09831
217	XLOC_019409	Ca_16326	Ca6:21063284-21064004	42.7823	9.07612	-2.23687
218	XLOC_019496	Ca_11140	Ca6:23113246-23115436	215.568	22.2919	-3.27355	F GO:0042973 glucan endo-1,3-beta-D-glucosidase activity,P GO:0005975 carbohydrate metabolic process	EC:3.2.1.21; EC:3.2.1.39; EC:3.2.1
219	XLOC_019710	Ca_16454	Ca6:30492502-30493888	151.041	30.8255	-2.29274	F GO:0016747 transferase activity, transferring acyl groups other than amino-acyl groups,P GO:0008152 metabolic process
220	XLOC_019719	Ca_16463	Ca6:30636690-30642914	71.1478	10.996	-2.69384	F GO:0080019 fatty-acyl-CoA reductase (alcohol-forming) activity,P GO:0055114 oxidation-reduction process
221	XLOC_019996	Ca_24241	Ca6:44527959-44542336	109.61	23.0991	-2.24648	C GO:0005737 cytoplasm,F GO:0004349 glutamate 5-kinase activity,F GO:0004350 glutamate-5-semialdehyde dehydrogenase activity,P GO:0006561 proline biosynthetic process,P GO:0016310 phosphorylation,P GO:0055114 oxidation-reduction process	EC:1.2.1.41; EC:2.7.2.11
222	XLOC_020249	Ca_18913	Ca6:53819317-53822776	23.1975	3.05897	-2.92285	F GO:0004553 hydrolase activity, hydrolyzing O-glycosyl compounds,P GO:0005975 carbohydrate metabolic process
223	XLOC_020273	Ca_21197	Ca6:54675558-54677005	35.6544	8.28628	-2.10528	F GO:0016740 transferase activity,P GO:0008152 metabolic process
224	XLOC_021038	Ca_02982,Ca_02983	Ca7:4675805-4679647	184.459	14.1747	-3.70191	P GO:0006952 defense response,P GO:0009607 response to biotic stimulus
225	XLOC_021396	Ca_09317	Ca7:11787494-11788626	71.9339	8.08796	-3.15282	F GO:0004497 monooxygenase activity,F GO:0005506 iron ion binding,F GO:0016705 oxidoreductase activity, acting on paired donors, with incorporation or reduction of molecular oxygen,F GO:0020037 heme binding,P GO:0055114 oxidation-reduction process
226	XLOC_021602	Ca_20578	Ca7:16785495-16792960	23.3561	4.74931	-2.29801
227	XLOC_021795	Ca_19903	Ca7:24638681-24642561	25.0275	4.59746	-2.4446	F GO:0004674 protein serine/threonine kinase activity,F GO:0005524 ATP binding,F GO:0030246 carbohydrate binding,P GO:0006468 protein phosphorylation,P GO:0048544 recognition of pollen	EC:2.7.11
228	XLOC_021800	Ca_19895	Ca7:24775712-24776591	71.133	15.9131	-2.1603	F GO:0005509 calcium ion binding
229	XLOC_021880	Ca_11811	Ca7:28911343-28912795	48.8936	3.87365	-3.65788	F GO:0016491 oxidoreductase activity,F GO:0046872 metal ion binding,P GO:0055114 oxidation-reduction process
230	XLOC_021954	Ca_10140	Ca7:31182340-31185636	32.2882	5.36444	-2.58951	C GO:0005622 intracellular,F GO:0004871 signal transducer activity,P GO:0000160 phosphorelay signal transduction system
231	XLOC_022227	Ca_19598	Ca7:39532220-39539740	16.7561	3.8318	-2.1286
232	XLOC_022667	Ca_02986	Ca7:4658459-4662430	162.948	6.6386	-4.61739	P GO:0006952 defense response,P GO:0009607 response to biotic stimulus
233	XLOC_022712	Ca_06822	Ca7:5454388-5457356	37.6657	9.10054	-2.04923	C GO:0005886 plasma membrane,C GO:0016021 integral component of membrane
234	XLOC_023157	Ca_09920	Ca7:15396311-15399743	222.673	49.3199	-2.17469	F GO:0004568 chitinase activity,F GO:0008061 chitin binding,P GO:0000272 polysaccharide catabolic process,P GO:0006032 chitin catabolic process,P GO:0006952 defense response,P GO:0016998 cell wall macromolecule catabolic process	EC:3.2.1.14
235	XLOC_023349	Ca_14524	Ca7:21757800-21760018	71.6687	6.06964	-3.56166	P GO:0050896 response to stimulus
236	XLOC_023513	-	Ca7:29498766-29499914	617.349	24.3376	-4.66483
237	XLOC_023583	Ca_10127	Ca7:31316732-31319849	211.585	52.7521	-2.00393	F GO:0016788 hydrolase activity, acting on ester bonds,P GO:0008152 metabolic process
238	XLOC_023795	Ca_13798	Ca7:37160901-37163584	13.1628	3.19054	-2.0446	F GO:0004090 carbonyl reductase (NADPH) activity,P GO:0055114 oxidation-reduction process	EC:1.1.1.184
239	XLOC_024425	Ca_15034	Ca8:1387546-1387843	43.8079	8.68697	-2.33426
240	XLOC_024447	Ca_02439	Ca8:1681647-1683634	34.4917	8.13077	-2.08479	F GO:0003824 catalytic activity,P GO:0008152 metabolic process
241	XLOC_024626	Ca_02070	Ca8:4686546-4987628	14.4988	3.47778	-2.05969	C GO:0005634 nucleus,F GO:0043565 sequence-specific DNA binding,P GO:0006355 regulation of transcription, DNA-templated
242	XLOC_024655	Ca_02018	Ca8:5314036-5315942	211.48	12.1375	-4.12298	F GO:0047526 2'-hydroxyisoflavone reductase activity,P GO:0055114 oxidation-reduction process	EC:1.3.1.45
243	XLOC_025103	Ca_11901	Ca8:337129-337330	27.7991	5.74121	-2.27561
244	XLOC_025242	Ca_02311	Ca8:2678330-2681121	2416.29	179.862	-3.74784	C GO:0005576 extracellular region,P GO:0019953 sexual reproduction
245	XLOC_025419	Ca_23582	Ca8:6328508-6336183	27.8072	5.83111	-2.25362	C GO:0016021 integral component of membrane
246	XLOC_025719	Ca_12999	Ca8:14698480-14699895	749.599	91.2719	-3.03788
247	XLOC_026062	Ca_17200	scaffold1047:324073-325634	78.6097	11.9667	-2.71568	F GO:0009055 electron carrier activity
248	XLOC_026205	Ca_11570	scaffold109_1:118617-122448	19.8783	4.23387	-2.23114
249	XLOC_026383	Ca_26892	scaffold1152:7073-10443	32.0617	3.1301	-3.35657	C GO:0009535 chloroplast thylakoid membrane,C GO:0009570 chloroplast stroma,C GO:0009941 chloroplast envelope,F GO:0000166 nucleotide binding,F GO:0003676 nucleic acid binding,P GO:0009773 photosynthetic electron transport in photosystem I,P GO:0019288 isopentenyl diphosphate biosynthetic process, methylerythritol 4-phosphate pathway,P GO:0045036 protein targeting to chloroplast
250	XLOC_026764	Ca_19775	scaffold1324:486763-489096	20.3254	3.6893	-2.46187	P GO:0009908 flower development,P GO:0010228 vegetative to reproductive phase transition of meristem
251	XLOC_026882	Ca_08803	scaffold1348_1:869648-1173100	22.6154	3.63117	-2.6388	F GO:0004497 monooxygenase activity,F GO:0005506 iron ion binding,F GO:0016705 oxidoreductase activity, acting on paired donors, with incorporation or reduction of molecular oxygen,F GO:0020037 heme binding,P GO:0055114 oxidation-reduction process
252	XLOC_026896	Ca_08825	scaffold1348_1:1345510-1346065	23.2081	4.54881	-2.35107	F GO:0004497 monooxygenase activity,F GO:0005506 iron ion binding,F GO:0016705 oxidoreductase activity, acting on paired donors, with incorporation or reduction of molecular oxygen,F GO:0020037 heme binding,P GO:0055114 oxidation-reduction process
253	XLOC_027439	Ca_26993,Ca_26994	scaffold1632:27808-91103	30.5114	7.1526	-2.09281
254	XLOC_027951	Ca_25214	scaffold1964:117662-120235	21.8527	4.1418	-2.39949	C GO:0016021 integral component of membrane,P GO:0006810 transport,P GO:0009651 response to salt stress,P GO:0009723 response to ethylene
255	XLOC_028124	Ca_26619	scaffold2040:64637-67012	170.357	10.3333	-4.04319	F GO:0004497 monooxygenase activity,F GO:0005506 iron ion binding,F GO:0016705 oxidoreductase activity, acting on paired donors, with incorporation or reduction of molecular oxygen,F GO:0020037 heme binding,P GO:0055114 oxidation-reduction process
256	XLOC_028187	Ca_21892	scaffold210:17100-17283	103.409	25.6251	-2.01273
257	XLOC_028706	Ca_27756	scaffold2678:94319-95264	17.6521	3.87876	-2.18617
258	XLOC_028787	Ca_24403	scaffold2763:156577-162624	112.829	12.4417	-3.18087
259	XLOC_029048	Ca_25903	scaffold305:164546-169528	52.7018	3.94994	-3.73795	F GO:0016746 transferase activity, transferring acyl groups,P GO:0008152 metabolic process
260	XLOC_029145	Ca_21803,Ca_21804	scaffold314:297115-351885	31.5921	4.53594	-2.80009	F GO:0016746 transferase activity, transferring acyl groups,P GO:0008152 metabolic process
261	XLOC_029409	Ca_25598	scaffold3422:40968-42132	39.7769	6.70661	-2.56828	F GO:0046872 metal ion binding,P GO:0030001 metal ion transport
262	XLOC_030524	Ca_23921	scaffold545:85178-101438	48.9353	9.62764	-2.34562
263	XLOC_030730	Ca_26410	scaffold593:139814-143698	18.5673	3.12883	-2.56907	F GO:0004672 protein kinase activity,F GO:0005524 ATP binding,P GO:0006468 protein phosphorylation
264	XLOC_031194	Ca_23809	scaffold731:68133-76418	34.929	8.10756	-2.10708	C GO:0016021 integral component of membrane
265	XLOC_031858	-	scaffold924:142248-143993	210.313	43.9848	-2.25746	F GO:0046872 metal ion binding,P GO:0030001 metal ion transport
