# Supplementary material for: RNA-Seq analysis revealed genes associated with drought stress response in kabuli chickpea (Cicer arietinum L.)
Source: PLoS One. 2018 Jun 28;13(6):e0199774. doi: 10.1371/journal.pone.0199774 (PMC6023194; doi:10.1371/journal.pone.0199774)
Supplement: S4 Table — (XLS) [file pone.0199774.s004.xls]

## Sheet: TFs in root
S4 Table: Drought responsive genes encoding TFs in root tissues
Sno	Test_Gene_Id	Reference_Gene_Id	Location	BRD_FPKM	HRD_FPKM	log2(fold_change)	Transcription Factor	Family
1	XLOC_000635	Ca_08030,Ca_08031,Ca_08035	Ca1:7778433-7874591	10.8911	46.4004	2.09099	Pyrus bretschneideri GRAS family	GRAS
2	XLOC_000884	Ca_02523	Ca1:12302405-12303915	13.4082	71.8086	2.42104	GSVIVT01030085001Vvi Vitis vinifera FASCICLIN-like arabinogalactan 2	NF-YB
	XLOC_001265	Ca_19296	Ca1:23857119-23876079	5.13688	50.4702	3.29647	XP_004488106Car Cicer arietinum ERF family	ERF
3	XLOC_002197	Ca_02925	Ca1:8828002-8829204	11.2026	54.3649	2.27884	XP_004486612Car Cicer arietinum WRKY family	WRKY
4	XLOC_002433	Ca_02457	Ca1:12877080-12882516	6.95259	29.8999	2.10452	XP_004487194Car Cicer arietinum NAC family	NAC
	XLOC_003447	-	Ca1:16276444-16277474	33.8347	285.225	3.07552	GSVIVT01013228001Vvi Vitis vinifera pinoid-binding 1	MYB_related
5	XLOC_004296	Ca_14296	Ca2:25797418-25800700	11.7663	55.7836	2.24518	MDP0000283274Mdo Malus domestica phosphatase 2C family	B3
6	XLOC_005292	Ca_15957	Ca2:18930021-18932424	4.99809	22.4568	2.16771	Bra001729Bra Brassica rapa B3 family	B3
	XLOC_005860	Ca_09798	Ca2:36183189-36184302	40.441	279.688	2.78993	Utricularia gibba bHLH family	BHLH
7	XLOC_006124	Ca_22380	Ca3:4206078-4206681	58.571	292.669	2.32101	MDP0000291883Mdo Malus domestica ARF-GAP domain 11	FAR1
8	XLOC_007563	Ca_20654	Ca3:5552209-5557457	7.20449	30.6927	2.09093	Bra001729Bra Brassica rapa B3 family	B3
	XLOC_008400	Ca_12195	Ca3:30973535-30975125	20.5697	108.195	2.39504	Arabidopsis thaliana auxin response factor 11	AUX-IAA
9	XLOC_008541	Ca_00703	Ca3:34274661-34276354	3.35417	14.5569	2.11767	XP_004494064Car Cicer arietinum MYB family	MYB
10	XLOC_008607	Ca_00844	Ca3:35597305-35598004	9.69809	44.8382	2.20895	MDP0000231542Mdo Malus domestica Basic-leucine zipper (bZIP) transcription factor family	bZIP
	XLOC_009047	-	Ca3:32551839-32553084	8.93754	70.741	2.9846	Medicago truncatula C2H2 family	C2H2
11	XLOC_009214	Ca_12079	Ca4:2797715-2798126	8.30369	40.7946	2.29655	XP_004495317Car Cicer arietinum ERF family	ERF
12	XLOC_010966	-	Ca4:1251559-1254302	5.97918	35.5381	2.57135	Bra001729Bra Brassica rapa B3 family	B3
	XLOC_011077	Ca_12133	Ca4:3315371-3322825	3.2111	44.7249	3.79994	Bra001729Bra Brassica rapa B3 family	B3
13	XLOC_014525	Ca_04100	Ca5:46422862-46424540	11.9301	55.9078	2.22845	XP_004502820Car Cicer arietinum WRKY family	WRKY
14	XLOC_016644	Ca_10437	Ca6:2951774-2954662	7.37063	38.2964	2.37735	03S_FGP15120Oba Oryza barthii C3H family	C3H
	XLOC_016739	Ca_05815	Ca6:4813994-4817645	4.12491	17.3704	2.0742	Cajanus cajan WRKY family	WRKY
15	XLOC_017317	Ca_06350	Ca6:17347693-17350822	3.65028	18.389	2.33276	_FGP24418Opu Oryza punctata bZIP family	bZIP
16	XLOC_017416	Ca_06533	Ca6:19269662-19274430	8.17762	36.0437	2.13999	BGIOSGA029206-PAOsi Oryza sativa Indica Group ERF family	ERF
	XLOC_019150	Ca_05235	Ca6:14653474-14653879	4.8259	48.9018	3.34102	GSMUA_Achr10P17130_001Mac Musa acuminata bHLH family	bHLH
17	XLOC_019282	Ca_06367	Ca6:17524459-17526556	8.13578	37.5806	2.20763	Lus10023829Lus Linum usitatissimum RAB GTPase homolog A4D	bHLH
18	XLOC_020940	Ca_03171	Ca7:3011846-3013292	10.7619	140.232	3.70382	MDP0000730019Mdo Malus domestica SBP family	SBP
	XLOC_021800	Ca_19895	Ca7:24775712-24776591	49.7507	346.21	2.79886	GSVIVT01013228001Vvi Vitis vinifera pinoid-binding 1	MYB_related
19	XLOC_021920	Ca_11721	Ca7:30061759-30065203	4.68146	20.9999	2.16535	Pyrus bretschneideri ERF family	ERF
20	XLOC_022059	Ca_21006	Ca7:34128577-34167676	8.26141	40.3612	2.28851	443461Smo Selaginella moellendorffii nuclear RNA polymerase C2	ERF
	XLOC_022525	Ca_03261	Ca7:2107969-2109027	14.2406	107.337	2.91407	Lus10007348Lus Linum usitatissimum xyloglucan endotransglucosylase hydrolase 16	MYB_related
21	XLOC_022526	Ca_03260	Ca7:2111267-2112410	5.09916	39.9161	2.96864	Lus10007348Lus Linum usitatissimum xyloglucan endotransglucosylase hydrolase 16	MYB_related
22	XLOC_022568	Ca_03175	Ca7:2983667-2986920	9.93687	55.4255	2.47969	MDP0000449389Mdo Malus domestica Peroxidase superfamily	M-type
	XLOC_023469	Ca_18928	Ca7:28410627-28418274	7.10891	34.2973	2.2704	GSMUA_Achr8P25970_001Mac Musa acuminata MYB family	MYB
23	XLOC_024530	Ca_02262	Ca8:3173502-3174182	3.05183	13.5653	2.15218	XP_004511795Car Cicer arietinum bHLH family	bHLH
24	XLOC_025737	Ca_12972	Ca8:14998301-15003881	12.9467	88.4744	2.77267	Lus10030143Lus Linum usitatissimum NAC (No Apical Meristem) domain transcriptional regulator superfamily	NAC
	XLOC_026824	Ca_22589	scaffold134:306652-307027	6.87484	36.4639	2.40707	GSVIVT01013228001Vvi Vitis vinifera pinoid-binding 1	MYB_related
25	XLOC_028705	Ca_27757	scaffold2678:104597-105545	16.208	99.8003	2.62234	MDP0000574942Mdo Malus domestica myb domain 9	MYB
26	XLOC_028706	Ca_27756	scaffold2678:94319-95264	14.9041	90.3527	2.59986	MDP0000574942Mdo Malus domestica myb domain 9	MYB
	XLOC_029232	Ca_16309	scaffold3254_2:106996-107736	3.05683	58.6341	4.26163	Cajanus cajan Trihelix family	Trihelix
27	XLOC_029530	Ca_24991,Ca_24992	scaffold362:163781-167452	30.7881	127.14	2.04598	XP_004485592Car Cicer arietinum C2H2 family	C2H2
28	XLOC_029642	Ca_23626	scaffold38:479656-481637	22.2466	158.686	2.83451	Glycine max Integrase-type DNA-binding superfamily	ERF
	XLOC_030864	Ca_19118	scaffold642:612312-625788	25.8386	136.602	2.40238	Aan020124Aan Artemisia annua MYB family	MYB
29	XLOC_002035	Ca_00603	Ca1:5128706-5130991	508.733	10.0691	-5.6589	MDP0000288192Mdo Malus domestica homeobox-1	HB-other
30	XLOC_002880	Ca_20295	Ca1:26963387-26965788	53.3174	9.81526	-2.44151	Bra001729Bra Brassica rapa B3 family	B3
	XLOC_003377	-	Ca1:1777076-1778063	27.1118	5.08692	-2.41406	Populus trichocarpa DBB family	DBB
31	XLOC_003785	Ca_14692	Ca2:5192004-5192424	29.295	3.05279	-3.26245	NNU_003323-RANnu Nelumbo nucifera HSF family	HSF
32	XLOC_004749	Ca_16983	Ca2:395581-401546	102.956	23.847	-2.11015	Brachypodium distachyon bHLH family	bHLH
	XLOC_005590	Ca_12525	Ca2:30242079-30242541	31.9633	4.5122	-2.82452	NNU_003323-RANnu Nelumbo nucifera HSF family	HSF
33	XLOC_006059	Ca_22645	Ca3:727041-729844	161.957	30.102	-2.42768	Oryza brachyantha bHLH family	bHLH
34	XLOC_011507	Ca_04411	Ca4:11891329-11895735	46.9053	9.17169	-2.35449	L143hybridFve Fragaria vesca kinase superfamily	Trihelix
	XLOC_014097	Ca_01425	Ca5:37968716-37970356	17.2729	3.61631	-2.25592	Utricularia gibba MIKC family	MIKC
35	XLOC_015786	Ca_01418	Ca5:38030159-38032006	163.247	34.8056	-2.22966	- -hybridFve Fragaria vesca zinc finger (C3HC4-type RING finger) family	C3H
36	XLOC_016850	Ca_16949	Ca6:6867164-6871928	63.6375	9.63865	-2.72297	BGIOSGA030830-PAOsi Oryza sativa Indica Group MYB family	MYB
	XLOC_017696	Ca_14594	Ca6:27635844-27636312	64.6223	14.0095	-2.20563	NNU_003323-RANnu Nelumbo nucifera HSF family	HSF
37	XLOC_019871	Ca_19814	Ca6:36741805-36743263	125.81	28.7489	-2.12967	PH01002606G0040Phe Phyllostachys heterocycla HSF family	HSF
38	XLOC_019872	Ca_19813	Ca6:36764504-36770525	109.395	24.1945	-2.17679	Brachypodium distachyon bHLH family	bHLH
	XLOC_020340	Ca_17430	Ca6:56992227-56994172	24.4465	5.76624	-2.08393	GSMUA_Achr3P25240_001Mac Musa acuminata Nin-like family	Nin-like
39	XLOC_021175	Ca_06635	Ca7:7256805-7264949	35.0869	6.96215	-2.33333	03S_FGP17685Oba Oryza barthii C3H family	C3H
40	XLOC_021349	Ca_12825	Ca7:10684395-10689774	73.8558	16.4158	-2.16963	XP_004509000Car Cicer arietinum ARR-B family	ARR-B
	XLOC_023629	Ca_10055,Ca_10056,Ca_10057	Ca7:32126828-32163041	1328.09	212.604	-2.64312	Lus10031505Lus Linum usitatissimum lipoxygenase 1	NF-YA
41	XLOC_023631	Ca_10054	Ca7:32199698-32204448	313.722	39.5026	-2.98947	Lus10031505Lus Linum usitatissimum lipoxygenase 1	NF-YA
42	XLOC_026637	Ca_21511,Ca_21512	scaffold1281:176452-183233	27.1219	4.86495	-2.47896	GSMUA_Achr7P08840_001Mac Musa acuminata HD-ZIP family	HD-ZIP
	XLOC_026896	Ca_08825	scaffold1348_1:1345510-1346065	29.8613	3.56516	-3.06624	mgv1a026303mMgu Mimulus guttatus LOB domain-containing 25	LBD
43	XLOC_027809	Ca_26975	scaffold1852:64489-65482	65.9232	14.1926	-2.21565	BGIOSGA034756-PAOsi Oryza sativa Indica Group NAC family	NAC
44	XLOC_028631	Ca_23091	scaffold26:276271-281413	20.0016	3.65663	-2.45153	Pyrus bretschneideri C2H2 family	C2H2
