# Supplementary material for: RNA-Seq analysis revealed genes associated with drought stress response in kabuli chickpea (Cicer arietinum L.)
Source: PLoS One. 2018 Jun 28;13(6):e0199774. doi: 10.1371/journal.pone.0199774 (PMC6023194; doi:10.1371/journal.pone.0199774)
Supplement: S5 Table — (XLS) [file pone.0199774.s005.xls]

## Sheet: TFs in shoot
S5 Table :Drought responsive genes encoding TFs in the shoot tissues
Sno	Test_Gene_ID	Gene_ID (Reference)	Location	BSD_FPKM	HSD_FPKM	log2(fold_change)	Transcription Factor	Family
1	XLOC_000596	Ca_07978	Ca1:7219739-7222073	4.46403	36.2679	3.02228	03S_FGP24027Oba Oryza barthii NF-YB family	NF-YB
2	XLOC_000603	Ca_07985	Ca1:7280776-7283272	8.1511	32.6316	2.0012	BGIOSGA012704-PAOsi Oryza sativa Indica Group MYB_related family	MYB-related
3	XLOC_000884	Ca_02523	Ca1:12302405-12303915	131.935	989.18	2.90641	GSVIVT01030085001Vvi Vitis vinifera FASCICLIN-like arabinogalactan 2	NF-YB
4	XLOC_001116	Ca_14788	Ca1:17454585-17461571	7.42887	31.4098	2.08	- -hybridFve Fragaria vesca Glycosyl hydrolase family	C2H2
5	XLOC_002324	Ca_02687	Ca1:10737186-10740414	30.7473	123.01	2.00024	- -hybridFve Fragaria vesca pfkB-like carbohydrate kinase family	MIKC
6	XLOC_002369	Ca_02602	Ca1:11486724-11492646	22.7256	93.7766	2.04491	MDP0000247737Mdo Malus domestica FAR1 family	FAR1
7	XLOC_002488	Ca_14134	Ca1:13684752-13687169	8.64819	61.7835	2.83675	Lus10007348Lus Linum usitatissimum xyloglucan endotransglucosylase hydrolase 16	MYB-related
8	XLOC_002780	Ca_22360	Ca1:23154496-23158418	4.88635	36.7015	2.90901	_FGP24461Opu Oryza punctata G2-like family	G2-like
9	XLOC_003338	Ca_12925	Ca1:47282372-47285731	3.52041	16.1474	2.19749	XP_004489002Car Cicer arietinum BES1 family	BES1
10	XLOC_006042	Ca_22944	Ca3:53039-61276	8.18357	33.921	2.05138	MDP0000565292Mdo Malus domestica B-box type zinc finger with CCT domain	CO-like
11	XLOC_006314	Ca_22236	Ca3:12294433-12297058	35.5368	152.937	2.10556	Tp3g07810Tpa Thellungiella parvula MYB_related family	MYB-related
12	XLOC_006618	Ca_06208	Ca3:23014863-23016554	4.62198	24.6674	2.41602	Bra001729Bra Brassica rapa B3 family	B3
13	XLOC_006916	Ca_07275	Ca3:29700612-29704256	4.46768	19.3965	2.1182	Jatropha curcas NF-YB family	NF-YB
14	XLOC_007156	Ca_00767	Ca3:34886013-34889828	14.8739	63.5447	2.09498	900671Aly Arabidopsis lyrata ERF family	ERF
15	XLOC_007650	Ca_20971	Ca3:9444248-9450511	5.01117	31.7176	2.66206	MA_11351g0010Pab Picea abies WRKY family	WRKY
16	XLOC_008697	Ca_00998	Ca3:36748092-36755139	3.74005	79.4565	4.40904	- -hybridFve Fragaria vesca Glycosyl hydrolase family	C2H2
17	XLOC_009746	Ca_04551	Ca4:13282777-13287417	8.3574	135.197	4.01587	MDP0000254650Mdo Malus domestica NAD(P)-linked oxidoreductase superfamily	bHLH
18	XLOC_009752	Ca_04564	Ca4:13420571-13421974	7.97648	38.054	2.25422	Cajanus cajan S1Fa-like family	S1Fa-like
19	XLOC_009886	Ca_05511	Ca4:15956235-15957042	5.28355	24.8832	2.23559	Lotus japonicus C2H2 family	C2H2
20	XLOC_010198	Ca_16612	Ca4:26166943-26172962	9.55615	127.333	3.73604	GSMUA_Achr7P08840_001Mac Musa acuminata HD-ZIP family	HD-ZIP
21	XLOC_010772	Ca_19272	Ca4:46419615-46421449	10.8135	61.6637	2.51159	XP_004499043Car Cicer arietinum WOX family	WOX
22	XLOC_011699	Ca_05547	Ca4:15538913-15543410	3.33481	37.8537	3.50476	XP_004497020Car Cicer arietinum C3H family	C3H
23	XLOC_011929	Ca_20147	Ca4:21881580-21885175	27.1086	114.463	2.07805	GSMUA_Achr11P19880_001Mac Musa acuminata ERF family	ERF
24	XLOC_013837	Ca_04993	Ca5:32965237-32967150	721.961	3030.28	2.06946	GRMZM2G153575_P01Zma Zea mays Trihelix family	Trihelix
25	XLOC_014112	Ca_01399	Ca5:38194237-38198064	20.2929	93.7512	2.20786	MA_11351g0010Pab Picea abies WRKY family	WRKY
26	XLOC_014215	Ca_07589	Ca5:40694886-40705247	12.2619	73.9338	2.59206	Pyrus bretschneideri ERF family	ERF
27	XLOC_014373	Ca_12680	Ca5:43712963-43722227	18.6493	93.8331	2.33098	GSMUA_Achr9P13010_001Mac Musa acuminata MIKC family	MIKC
28	XLOC_015235	-	Ca5:27325736-27540807	3.3913	19.1469	2.4972	GSMUA_Achr11P19880_001Mac Musa acuminata ERF family	ERF
29	XLOC_015236	-	Ca5:27325736-27540807	4.15187	18.2714	2.13775	Gossypium raimondii Leucine-rich repeat kinase family	WRKY
30	XLOC_017453	Ca_16357	Ca6:20750139-20756797	7.40997	38.1286	2.36333	Pyrus bretschneideri MYB_related family	MYB-related
31	XLOC_018909	Ca_08667	Ca6:9322809-9328413	3.55572	21.3293	2.58463	XP_004504217Car Cicer arietinum HD-ZIP family	HD-ZIP
32	XLOC_019282	Ca_06367	Ca6:17524459-17526556	8.17995	67.1502	3.03723	Lus10023829Lus Linum usitatissimum RAB GTPase homolog A4D	bHLH
33	XLOC_019655	Ca_26118	Ca6:28268895-28272914	89.3107	362.318	2.02035	Bra035708Bra Brassica rapa GATA family	GATA
34	XLOC_020254	Ca_18917	Ca6:53893968-53944950	21.65	123.029	2.50656	Jatropha curcas NAC family	NAC
35	XLOC_020439	Ca_18876	Ca6:58938384-58938693	8.34269	43.5631	2.38452	GRMZM5G899865_P01Zma Zea mays bHLH family	bHLH
36	XLOC_022714	Ca_06818	Ca7:5472080-5479655	4.55259	29.8332	2.71216	EMT29229Ata Aegilops tauschii B3 family	B3
37	XLOC_022864	Ca_13196	Ca7:8174089-8179477	4.27644	28.9135	2.75726	Thecc1EG000515t1Tca Theobroma cacao Cytochrome P450 (71%P)	B3
38	XLOC_023115	Ca_23045	Ca7:14342577-14349032	3.18135	30.1351	3.24373	Thecc1EG029045t1Tca Theobroma cacao Beta-galactosidase 17 (66%P)	C2H2
39	XLOC_023476	Ca_18941	Ca7:28520092-28521157	4.79095	33.2124	2.79334	GSMUA_Achr4P28960_001Mac Musa acuminata SBP family	SBP
40	XLOC_024668	Ca_02001	Ca8:5437161-5444918	3.15719	14.2388	2.17311	Neem_16119_f_2Ain Azadirachta indica bHLH family	bHLH
41	XLOC_024714	Ca_01927	Ca8:6189162-6194638	3.0043	12.9913	2.11244	Brachypodium distachyon Nin-like family	Nin-like
42	XLOC_025413	Ca_01935	Ca8:6112186-6116887	9.74489	83.9895	3.10749	MDP0000449389Mdo Malus domestica Peroxidase superfamily	M-type
43	XLOC_025936	-	scaffold1006:218757-223050	6.09684	35.8085	2.55417	Glycine max myb domain 52	MYB
44	XLOC_026875	Ca_08790	scaffold1348_1:869648-1173100	6.01867	52.1231	3.11441	GSMUA_Achr7P08840_001Mac Musa acuminata HD-ZIP family	HD-ZIP
45	XLOC_028429	Ca_26721	scaffold2368:59488-59788	4.13102	34.7838	3.07385	Cajanus cajan MYB family	MYB
46	XLOC_029412	Ca_25602	scaffold3422:92501-95745	43.8152	287.689	2.71501	915820Aly Arabidopsis lyrata G2-like family	G2-like
47	XLOC_029426	Ca_11938,Ca_11942	scaffold346_1:8317-75292	3.27404	15.5083	2.2439	Lus10007348Lus Linum usitatissimum xyloglucan endotransglucosylase hydrolase 16	MYB-related
48	XLOC_029955	Ca_22212	scaffold420:333974-343325	16.8217	161.21	3.26055	Jatropha curcas NAC family	NAC
49	XLOC_001163	Ca_17387	Ca1:18657393-18661736	258.803	35.7424	-2.85615	Thecc1EG000515t1Tca Theobroma cacao Cytochrome P450 (71%P)	B3
50	XLOC_001857	Ca_00232	Ca1:1848874-1850254	47.9407	6.24787	-2.93981	Glycine max MYB-like 102	MYB
51	XLOC_001955	Ca_00449	Ca1:3686095-3689629	49.05	8.02265	-2.6121	Populus trichocarpa FAR1 family	FAR1
52	XLOC_002332	Ca_02674	Ca1:10840017-10846053	72.1032	14.8636	-2.27828	Jatropha curcas NAC family	NAC
53	XLOC_002641	Ca_06873	Ca1:16960750-16964288	69.5463	16.9072	-2.04033	03S_FGP27419Oba Oryza barthii BES1 family	BES1
54	XLOC_004591	Ca_15236	Ca2:34131921-34135043	48.5648	6.11591	-2.98927	XP_004491313Car Cicer arietinum NAC family	NAC
55	XLOC_004908	Ca_21107	Ca2:4328986-4373243	43.3977	6.80934	-2.67203	PH01002606G0040Phe Phyllostachys heterocycla HSF family	HSF
56	XLOC_005168	Ca_18090	Ca2:12745798-12747551	26.8239	5.3307	-2.33112	Cajanus cajan NAC family	NAC
57	XLOC_005859	Ca_09797	Ca2:36172410-36173523	52.1344	6.73015	-2.95352	Utricularia gibba bHLH family	bHLH
58	XLOC_005860	Ca_09798	Ca2:36183189-36184302	29.5653	4.79232	-2.62511	Utricularia gibba bHLH family	bHLH
59	XLOC_006567	Ca_09533	Ca3:21816590-21818952	78.0358	3.26118	-4.58067	MDP0000265073Mdo Malus domestica NAD(P)-binding Rossmann-fold superfamily	NAC
60	XLOC_007749	Ca_22495	Ca3:15015489-15017337	58.5762	4.85681	-3.59223	PH01002606G0040Phe Phyllostachys heterocycla HSF family	HSF
61	XLOC_008558	Ca_00743	Ca3:34682642-34683683	28.2878	5.67948	-2.31635	MDP0000464809Mdo Malus domestica alpha beta-Hydrolases superfamily	GRAS
62	XLOC_008606	Ca_00843	Ca3:35593119-35593803	29.7808	6.7476	-2.14194	MDP0000231542Mdo Malus domestica Basic-leucine zipper (bZIP) transcription factor family	bZIP
63	XLOC_009672	Ca_04405	Ca4:11847174-11847966	266.523	24.0491	-3.47021	03S_FGP8440Oba Oryza barthii C2H2 family	C2H2
64	XLOC_013053	Ca_24943	Ca5:3721260-3722682	34.8752	6.30206	-2.46831	MDP0000710259Mdo Malus domestica MYB-like 102	MYB
65	XLOC_013848	Ca_05018	Ca5:33254989-33262526	52.9329	6.05034	-3.12908	MDP0000314088Mdo Malus domestica Glycosyl hydrolase family with chitinase insertion domain	G2-like
66	XLOC_014538	Ca_04125	Ca5:46667054-46669148	345.042	22.3474	-3.9486	BGIOSGA012704-PAOsi Oryza sativa Indica Group MYB_related family	MYB-related
67	XLOC_015454	Ca_04874,Ca_04875	Ca5:31693761-31717294	148.932	36.5573	-2.02643	Populus trichocarpa FAR1 family	FAR1
68	XLOC_016739	Ca_05815	Ca6:4813994-4817645	28.1295	3.32903	-3.07891	Cajanus cajan WRKY family	WRKY
69	XLOC_017319	Ca_06357,Ca_06358	Ca6:17441694-17448366	183.135	38.9249	-2.23414	Oryza brachyantha bHLH family	bHLH
70	XLOC_019081	Ca_05112	Ca6:13394404-13396030	39.3485	4.52464	-3.12043	Thecc1EG000515t1Tca Theobroma cacao Cytochrome P450 (71%P)	B3
71	XLOC_019115	Ca_05173	Ca6:14069292-14071155	25.9444	6.05882	-2.09831	Glycine max WRKY DNA-binding 28	WRKY
72	XLOC_019496	Ca_11140	Ca6:23113246-23115436	215.568	22.2919	-3.27355	Pyrus bretschneideri ERF family	ERF
73	XLOC_019710	Ca_16454	Ca6:30492502-30493888	151.041	30.8255	-2.29274	Utricularia gibba ARF family	ARF
74	XLOC_019996	Ca_24241	Ca6:44527959-44542336	109.61	23.0991	-2.24648	- -hybridFve Fragaria vesca delta 1-pyrroline-5-carboxylate synthase 2	B3
75	XLOC_020249	Ca_18913	Ca6:53819317-53822776	23.1975	3.05897	-2.92285	Lus10009218Lus Linum usitatissimum Zinc finger (C2H2 type) family transcription factor jumonji (jmj) family	C2H2
76	XLOC_021396	Ca_09317	Ca7:11787494-11788626	71.9339	8.08796	-3.15282	Thecc1EG000515t1Tca Theobroma cacao Cytochrome P450 (71%P)	B3
77	XLOC_021795	Ca_19903	Ca7:24638681-24642561	25.0275	4.59746	-2.4446	- -hybridFve Fragaria vesca cysteine-rich RLK (RECEPTOR kinase) 42	TALE
78	XLOC_021800	Ca_19895	Ca7:24775712-24776591	71.133	15.9131	-2.1603	GSVIVT01013228001Vvi Vitis vinifera pinoid-binding 1	MYB-related
79	XLOC_022227	Ca_19598	Ca7:39532220-39539740	16.7561	3.8318	-2.1286	XP_004510943Car Cicer arietinum LBD family	LBD
80	XLOC_022712	Ca_06822	Ca7:5454388-5457356	37.6657	9.10054	-2.04923	_FGP9883Opu Oryza punctata LSD family	LSD
81	XLOC_023583	Ca_10127	Ca7:31316732-31319849	211.585	52.7521	-2.00393	Populus trichocarpa FAR1 family	FAR1
82	XLOC_023795	Ca_13798	Ca7:37160901-37163584	13.1628	3.19054	-2.0446	MDP0000191614Mdo Malus domestica NAD(P)-binding Rossmann-fold superfamily	NAC
83	XLOC_024626	Ca_02070	Ca8:4686546-4987628	14.4988	3.47778	-2.05969	XP_004512013Car Cicer arietinum HD-ZIP family	HD-ZIP
84	XLOC_026205	Ca_11570	scaffold109_1:118617-122448	19.8783	4.23387	-2.23114	Oryza sativa Japonica Group transposon , , unclassified, expressed	Transposon
85	XLOC_026383	Ca_26892	scaffold1152:7073-10443	32.0617	3.1301	-3.35657	Lus10021035Lus Linum usitatissimum RNA-binding (RRM RBD RNP motifs) family	G2-like
86	XLOC_026882	Ca_08803	scaffold1348_1:869648-1173100	22.6154	3.63117	-2.6388	Thecc1EG000515t1Tca Theobroma cacao Cytochrome P450 (71%P)	B3
87	XLOC_026896	Ca_08825	scaffold1348_1:1345510-1346065	23.2081	4.54881	-2.35107	mgv1a026303mMgu Mimulus guttatus LOB domain-containing 25	LBD
88	XLOC_028124	Ca_26619	scaffold2040:64637-67012	170.357	10.3333	-4.04319	Thecc1EG000515t1Tca Theobroma cacao Cytochrome P450 (71%P)	B3
89	XLOC_028706	Ca_27756	scaffold2678:94319-95264	17.6521	3.87876	-2.18617	MDP0000574942Mdo Malus domestica myb domain 9	MYB
90	XLOC_029145	Ca_21803,Ca_21804	scaffold314:297115-351885	31.5921	4.53594	-2.80009	- -hybridFve Fragaria vesca cysteine-rich RLK (RECEPTOR kinase) 42	TALE
91	XLOC_030524	Ca_23921	scaffold545:85178-101438	48.9353	9.62764	-2.34562	- -hybridFve Fragaria vesca disease resistance family LRR family	WRKY
92	XLOC_030730	Ca_26410	scaffold593:139814-143698	18.5673	3.12883	-2.56907	- -hybridFve Fragaria vesca kinase superfamily	Trihelix
93	XLOC_031194	Ca_23809	scaffold731:68133-76418	34.929	8.10756	-2.10708	BGIOSGA030830-PAOsi Oryza sativa Indica Group MYB family	MYB
